# Supplementary material
Source: PubMed Central journal article supplement (PMC7003985)
Supplement: NIHMS1066650-supplement-Supplemental.pdf [file NIHMS1066650-supplement-Supplemental.pdf]

1 **SUPPLEMENTARY MATERIAL**

2 Lactose drives *Enterococcus* expansion to promote graft-versus-host disease

3

4 Stein-Thoeringer, C.K.<sup>1,3</sup>, Nichols, K.B.<sup>1,3</sup>, Lazrak, A.<sup>1,3</sup>, Docampo, M.D.<sup>1,3</sup>, Slingerland, A.E.<sup>1,3</sup>,  
5 Slingerland, J.B.<sup>1,3</sup>, Clurman, A.G.<sup>2</sup>, Armijo, G.<sup>1,3</sup>, Gomes, A.L.C.<sup>1,3</sup>, Shono, Y.<sup>1,3</sup>, Staffas, A.<sup>1,3</sup>,  
6 Burgos da Silva, M.<sup>1,3</sup>, Devlin, S.<sup>4</sup>, Markey, K.A.<sup>1,2,3</sup>, Bajic, D.<sup>5</sup>, Pinedo, R.<sup>20</sup>, Tsakmaklis, A.<sup>6,19,21</sup>,  
7 Littmann, E.R.<sup>1,22</sup>, Pastore, A.<sup>1</sup>, Taur, Y.<sup>7</sup>, Monette, S.<sup>8</sup>, Arcila, M.E.<sup>9</sup>, Pickard, A.J.<sup>10</sup>, Maloy, M.<sup>2</sup>,  
8 Wright, R.J.<sup>1</sup>, Amoretti, L.A.<sup>1</sup>, Fontana, E.<sup>1</sup>, Pham, D.<sup>11</sup>, Jamal, M.A.<sup>11</sup>, Weber, D.<sup>12</sup>, Sung, A.D.<sup>13</sup>,  
9 Hashimoto, D.<sup>14</sup>, Scheid, C.<sup>6</sup>, Xavier, J.B.<sup>15</sup>, Messina, J.A.<sup>16</sup>, Romero, K.<sup>17</sup>, Lew, M.<sup>13</sup>, Bush, A.<sup>13</sup>,  
10 Bohannon, L.<sup>13</sup>, Hayasaka, K.<sup>18</sup>, Hasegawa, Y.<sup>14</sup>, Vehreschild, M.J.G.T.<sup>6,19,21</sup>, Cross, J.R.<sup>10</sup>,  
11 Ponce, D.M.<sup>2,3</sup>, Perales, M.A.<sup>2,3</sup>, Giral, S.A.<sup>2,3</sup>, Jenq, R.R.<sup>11</sup>, Teshima, T.<sup>14,18</sup>, Holler, E.<sup>12</sup>, Chao,  
12 N.J.<sup>13</sup>, Pamer, E.G.<sup>1,3,22</sup>, Peled, J.U.<sup>1,2,3\*</sup>, van den Brink, M.R.M.<sup>1,2,3\*</sup>

13

14

15 Affiliations:

16 <sup>1</sup>Department of Immunology, Sloan Kettering Institute, Memorial Sloan Kettering Cancer Center, New  
17 York, NY; <sup>2</sup>Adult Bone Marrow Transplantation Service, Department of Medicine, Memorial Sloan  
18 Kettering Cancer Center, New York, NY; <sup>3</sup>Weill Cornell Medical College, NY; <sup>4</sup>Epidemiology and  
19 Biostatistics, Memorial Sloan Kettering Cancer Center, New York, NY; <sup>5</sup>Department of Internal Medicine  
20 II, Technical University of Munich, Germany; <sup>6</sup>Internal Medicine I, University Hospital Cologne, Germany;  
21 <sup>7</sup>Infectious Disease Service, Department of Medicine, Memorial Sloan Kettering Cancer Center, New  
22 York, NY; <sup>8</sup>Laboratory of Comparative Pathology, Memorial Sloan Kettering Cancer Center, The  
23 Rockefeller University, Weill Cornell Medicine, NY; <sup>9</sup>Diagnostic Molecular Pathology Laboratory, Memorial  
24 Sloan Kettering Cancer Center, NY; <sup>10</sup>Donald B. and Catherine C. Marron Cancer Metabolism Center,  
25 Memorial Sloan Kettering Cancer Center, New York, NY; <sup>11</sup>Department of Genomic Medicine, The  
26 University of Texas MD Anderson Cancer Center, Houston; <sup>12</sup>Internal Medicine III, University Clinic  
27 Regensburg, Regensburg, Germany; <sup>13</sup>Division of Hematologic Malignancies and Cellular Therapy,  
28 Department of Medicine, Duke University Medical Center, Durham, NC; <sup>14</sup>Department of Hematology,  
29 Hokkaido University, Faculty of Medicine, Sapporo, Japan; <sup>15</sup>Computational and Systems Biology  
30 Program, Memorial Sloan Kettering Cancer Center, New York, NY; <sup>16</sup>Division of Infectious Diseases,  
31 Department of Medicine, Duke University, Durham, NC; <sup>17</sup>Office of Clinical Research, Duke University  
32 School of Medicine, Durham, NC; <sup>18</sup>Division of Laboratory and Transfusion Medicine, Hokkaido University  
33 Hospital, Sapporo, Japan; <sup>19</sup>Department of Internal Medicine, Infectious Diseases, Goethe University  
34 Frankfurt, Germany; <sup>20</sup>Gnotobiotic Facility, Memorial Sloan Kettering Cancer Center, New York, NY;  
35 <sup>21</sup>German Center for Infection Research, Partner site Bonn-Cologne, Cologne, Germany; <sup>22</sup>Department of  
36 Medicine, Section of Infectious Medicine and Global Health, University of Chicago.

37 \* co-senior authors

38

## 1 MATERIAL and METHODS

### 3 Patients and fecal specimens

4 Stool samples were prospectively collected at four different transplant centers (Memorial Sloan  
5 Kettering Cancer Center (MSKCC) and Duke University Medical Center both in the United States,  
6 University Medical Center in Regensburg, Germany, and Hokkaido University Hospital in Japan)  
7 during different time periods over 1.4–8.8 years within the years 2009 – 2018 (MSKCC: Apr 2009  
8 to Jan 2018; Duke: Jul 2012 to Apr 2018; Regensburg: May 2011 to Jun 2017; Hokkaido: Aug  
9 2016 to Jan 2018). Samples were collected, aliquoted and frozen according to harmonized  
10 protocols at each center. DNA extraction, PCR for 16S rRNA amplicon sequencing, and analyses  
11 were performed centrally as described below. Written informed consent was received from  
12 participants prior to sample collection under the supervision of institutional review boards at each  
13 center. Patients with at least one evaluable sample collected after day –30 relative to a first allo-  
14 HCT were included. For most patients, samples were requested weekly. Patients underwent  
15 transplantation for a range of indications, although acute myeloid leukemia was the most common  
16 at all four centers. The patients varied in the intensity of pre-HCT conditioning regimen  
17 (**Supplementary Table S1**). The most common graft type was unmodified (i.e., not T-cell  
18 depleted) peripheral blood stem cells or bone-marrow (**Supplementary Table S1**). While three  
19 of the four centers administered cord-blood grafts, only one center infused grafts that were *ex*  
20 *vivo* T-cell depleted (TCD, allo-HCT patients at MSKCC). The 1,325 patients summarized in  
21 **Supplementary Table S1** provided 9,049 stool samples that were analyzed for microbiome  
22 composition (MSKCC: 1101 patients, 8472 samples; Duke: 79 patients, 231 samples; Hokkaido:  
23 66 patients, 202 samples; Regensburg: 79 patients, 144 samples).

24  
25 In the analysis of incidence of domination (**Figure 1a, left**), we computed the cumulative incidence  
26 of patients who experienced at least one instance of genus *Enterococcus* domination of the fecal  
27 microbiota (domination defined as a relative abundance of the genus  $\geq 0.3$ ) over the course of  
28 allo-HCT (day -20 to +24 relative to HCT) using 7-day sliding windows at different transplant  
29 centers. If no sample was collected from a patient in a given window, the cumulative incidence  
30 did not change but was plotted. We further analyzed the prevalence of domination as the fraction  
31 of fecal specimens with enterococcal domination of the gut microbiota (**Figure 1a, right**). Here,  
32 we only plotted the data points from time windows in which samples from at least 5 patients were  
33 available. The reason for this was that if very few samples were collected in a particular time  
34 window as the denominator, then even a low frequency of domination might appear to be a  
35 spuriously high frequency.

1 To determine fold-changes from baseline (pre-transplant), we defined a baseline period as day -  
2 30 to day -6 relative to HCT. For the patients with a baseline sample in this pre-transplant window  
3 and at least one subsequent sample, we plotted *E. faecium* abundance as a fold-change from the  
4 baseline value (**Figure S1c**). Both fold-increases and fold-decreases were observed; considering  
5 all samples collected between days 14-21, *E. faecium* abundance increased by a median of 6.4-  
6 fold and by a mean of 143.6-fold. In **Figure S1c**, we also present individual patient time courses  
7 normalized to baseline, where each thin trendline is a single patient's trend over time as fold-  
8 change from *E. faecium* abundance. Considering all samples collected between days 14 to 21  
9 from patients who became dominated at some point, *E. faecium* increased by a median of 120-  
10 fold and a mean of 332-fold. Considering all samples collected in the same time period from  
11 patients who never became dominated, *E. faecium* increased by a median of 2-fold and a mean  
12 of 55.6-fold.

13 For the analysis of clinical outcomes including GVHD, GVHD-related mortality (GRM), overall  
14 survival (OS), recipients of TCD grafts were excluded, and only patients with evaluable samples  
15 from day 0 to +21 were considered, yielding a sub-cohort for analysis of clinical outcomes  
16 (**Supplementary Table S3**). MSKCC patients (n = 538) served as the discovery cohort while 167  
17 patients from Regensburg, Duke, and Hokkaido were amalgamated into a multicenter validation  
18 cohort that included 62 patients from Duke, 38 from Hokkaido, and 67 from Regensburg. GVHD  
19 was graded according to the CIBMTR guidelines.

20

### 21 **Domination Threshold and Sensitivity Analysis**

22 The concept of microbial domination of the intestinal microbiota has been developed as to better  
23 understand microbiota injury and dysbiosis (33). We defined domination by a relative-abundance  
24 threshold of any single taxonomic unit  $\geq 0.3$  which was informed by a previous study from our  
25 center by Taur *et al.* (5). In this study, domination events by *Enterococcus* were associated with  
26 a 9-fold increase in risk of VRE bacteremia, and domination by proteobacteria increased the risk  
27 of bacteremia with aerobic gram-negative bacilli 5-fold (5). This threshold was recently also used  
28 to define intestinal and oral microbiota domination in another clinical cohort of AML patients (34).  
29 While we selected this threshold *a priori* on the basis of the prior studies, we also conducted a  
30 sensitivity analysis to assess the extent to which our observations are robust to various definitions  
31 of domination.

32 As shown in new **Supplemental Fig S2c**, the relative abundance of *E. faecium* in this dataset  
33 has a bimodal distribution with a broad peak between  $10^{-3}$  and  $10^{-2}$  and a second peak of very  
34 high abundances, including many samples in which *E. faecium* is virtually the only taxon identified.

1 For this sensitivity analysis, we selected 5 cut-offs in between these two peaks to evaluate: 0.1,  
2 0.2, 0.3, 0.4, and 0.5; the number of samples that are classified as dominated or not dominated  
3 are tabulated in **Supplemental Figure S2c**.

4 The cumulative incidence of genus *Enterococcus* domination was relatively insensitive to the  
5 specific threshold at which domination is defined (**Supplemental Figure S2c**). The cumulative  
6 incidence of domination dramatically increased around day 0 and then reached a plateau with  
7 relatively similar kinetics across all tested threshold definitions, although the height of the plateau  
8 varied with the definition such that fewer patients were considered to have had domination events  
9 at higher, more stringent thresholds.

10 Genus *Enterococcus* domination predicted a higher risk of all-cause mortality with high statistical  
11 significance at all tested domination thresholds and in both univariate and multivariate Cox models  
12 (**Supplemental Figure S2d**). *Enterococcus* domination predicted GVHD-related mortality at  
13 thresholds between 0.2 and 0.5, although in the lowest, least stringent threshold of 0.1 there was  
14 no longer a significant association for this outcome. P-values for the univariate and multivariate  
15 models are listed in **Table S3**. The multivariate Cox models were adjusted for graft source, age,  
16 conditioning intensity, gender, and underlying disease (leukemia vs other).

17  
18 In the main analysis, we considered patients to have had a domination event if even a single  
19 sample collected in the window of day 0 to +21 had *Enterococcus* (genus) abundance  $\geq 0.3$ . We  
20 also observed a similar result when we considered only each patient's last single sample collected  
21 in this window: The detection of *Enterococcus* domination (genus level) in the last sample  
22 between day 0-21 had an all-cause mortality HR of 1.75 (1.29-2.38),  $p < 0.001$ ; and for GVHD-  
23 related mortality HR 1.86 (1.07-3.22),  $p = 0.03$ .

24  
25 **Mice**  
26 C57BL/6J, BALB/cJ, 129S1/SvImJ, and LP/J mice were obtained from the Jackson Laboratory  
27 and kept under standard housing conditions (cohousing of 3 – 5 mice per cage, chow and water  
28 *ad libitum*, 12h-light cycle [6:00 pm: off]). Male mice were used for these experiments at an age  
29 of 6 to 9 weeks. For gnotobiotic / germ-free experiments, C57BL/6J mice were bred and housed  
30 in the MSKCC gnotobiotic facility with weekly microbiological monitoring of germ-free status (35).  
31 Experiments with germ-free/gnotobiotic mice were performed in individual gnotobiotic isocages  
32 (SentrySPP, Allentown). Mouse allo-HCT experiments were performed as previously described  
33 (10): conditioning regimens were split-dosed lethal irradiation with 1000 cGy for 129S1 recipients,  
34 with 900 cGy for BALB/c recipients, and busulfan/cyclophosphamide i.p. injections (busulfan



1 20mg/kg for 5 days; cyclophosphamide 100mg/kg for the last 3 days; (16)) for C57BL/6J mice  
2 (SPF and germ-free/gnotobiotic mice). Mice were transplanted with bone marrow (BM,  $5 \times 10^6$   
3 cells) that was T-cell depleted with anti-Thy-1.2 and Low-Tox-M rabbit complement  
4 (CEDARLANE Laboratories). Donor T cells were prepared by harvesting donor splenocytes and  
5 enriching T cells by Miltenyi MACS purification using CD5 (routinely >90% purity; T-cell dose  
6 indicated for each experiment separately in the main text/figure legends). BM or BM+T were  
7 administered by retroorbital injections in transiently isoflurane-anaesthetized mice. Mice were  
8 monitored daily for survival and weekly for GVHD clinical scores as described (10).

9 14 days after HCT organs were harvested in a subset of transplanted mice, and parts of the small  
10 intestine (ileum; last 2 cm cranial to cecum), proximal large intestine, liver, and skin samples  
11 evaluated histologically for evidence of GVHD, whereas spleens, ileum and colon tissues were  
12 processed for splenocyte or lamina propria cell preparations for flow cytometry (10).

13

#### 14 **Flow cytometry**

15 Antibodies were obtained from BD Biosciences Pharmingen, eBioscience or Biolegend. For cell  
16 analysis of surface markers, cells were stained for 20 min at 4°C in phosphate-buffered saline  
17 (PBS) with 0.5% bovine serum albumin (BSA) (PBS/BSA) after Fc block, washing, and  
18 resuspending in a viability staining solution (Fixable Dead Cell Stain, Molecular Probes, Life  
19 Technologies). Cell-surface staining was followed by intracellular staining with the  
20 fixation/permeabilization kit by eBioscience per the manufacturer's instructions. All flow-cytometry  
21 experiments were performed on a X50 flow cytometer (BD Biosciences) and analyzed with FlowJo  
22 10.4.1 (Tree Star Software).

23

#### 24 **Quantitative PCRs for gene expression analyses and SNP genotyping**

25 Duodenal or ileal segments of the small intestine were harvested from transplanted mice vs. mice  
26 at steady state. RNA was extracted using a Direct-zol RNA kit (Zymo Research), followed by RT-  
27 PCR using a Quantitect RT Kit (Quiagen). For real-time quantitative PCR we used TaqMan  
28 probes (Applied Biosystems) for murine Reg3B, Reg3G, lactase and GAPDH and a TaqMan  
29 universal master mix according to the manufacturer's instructions. The relative expression of  
30 target mRNAs was calculated by the  $\Delta$ Ct method and values were normalized to mRNA  
31 expression levels in controls.

32 SNP genotyping for the functional SNP rs4988235, upstream of the lactase gene, was performed  
33 using a TaqMan SNP genotyping protocol by Applied Biosystems (C\_\_\_2104745\_10). All qPCRs  
34 were run in 384 well formats on a QuantStudio 6 Flex Real-Time PCR system (Applied

1 Biosystems). To ensure SNP assessments reflected recipient and not donor genotype, archived  
2 buccal DNA samples that had been collected prior to allo-HCT were obtained from the clinical  
3 laboratory at MSKCC. All TaqMan-probes used in the present study are listed in **Table S10**.

#### 4 5 **Lactose measurements**

6 The lactose concentrations in brain-heart-infusion broth, regular cow milk or in a mouse chow  
7 suspension (5ml ddH<sub>2</sub>O/g chow) were measured by lactose assay kits (Abcam or Cell Biolabs)  
8 according to manufacturer's instructions. The mouse chow suspension was pretreated with  
9 perchloric acid precipitation (deproteinization protocol by Abcam) to increase assay sensitivity.  
10 BHI was pretreated with Lactaid® (3000 IU/ml) for 30min at 37°C.

#### 11 12 **Microbiome analyses**

13 *16S rRNA amplicon sequencing.* DNA was extracted from human or mouse fecal samples using  
14 a phenol-chloroform bead beating protocol, and the genomic 16S ribosomal-RNA gene V4-V5  
15 variable region was amplified and sequenced on the Illumina MiSeq platform as previously  
16 described (10, 11, 13). PCR products were purified using the Agencourt AMPure PCR amplicon  
17 purification system following the manufacturers' instructions. In cases of poor PCR amplification,  
18 the standard PCR buffer was replaced with Ampdirect Plus PCR buffer (Nacalai USA, San Diego,  
19 CA). The Operational Taxonomic Units (OTUs) were called by the vsearch algorithm (36) to  
20 dereplicate sequence reads. Reads were filtered to sequences of length between 200-350  
21 nucleotides and abundance size of at least two. The usearch algorithm was used to cluster OTUs  
22 (-cluster\_otus flag) with parameter -uparse\_break 3. The option uchime\_ref was further used to  
23 filter for chimeras according to a dereplicated version of NCBI 16S ribosomal RNA sequence  
24 database (37). OTUs were clustered at 97% identity. OTUs were classified to the species level  
25 against the Greengenes database (38), with gaps in taxonomic annotation filled in by classification  
26 against the NCBI 16S ribosomal RNA sequence database (37). We used the Qiime (39) function  
27 assign\_taxonomy.py and the assignment\_method mothur (40) to map sequences on green genes  
28 database. We used blastn on the 16S NCBI database to supplement genus and species  
29 annotation in sequences that had no genus/species assigned and a 97% match identity.

30  
31 Alpha-diversity: We calculated  $\alpha$ -diversity using the inverse Simpson index at the level of OTUs.  
32 Beta-diversity was computed according to Bray-Curtis distances at the genus level and clustered  
33 using a principal coordinates analysis (PCoA) ordination.

1 *Metagenome shotgun sequencing.* Extracted and purified DNA was sheared to a target size of  
2 650 bp with a Covaris ultrasonicator and prepared for sequencing with the Illumina TruSeq DNA  
3 library preparation kit according to the Illumina protocol. Sequencing was performed on a HiSeq  
4 system (Illumina) targeting  $\sim 10\text{-}20 \times 10^6$  reads per sample with 100 bp, paired-end reads.  
5 Metagenome sequences were further analyzed using the HUMAnN2 tool developed for the  
6 shotgun metagenome analyses of the Human Microbiome Project 2 as described (41). Prior to  
7 the HUMAnN2 workflow, shotgun sequences were filtered with quality control and removal of host  
8 reads using KneadData (<http://huttenhower.sph.harvard.edu/kneaddata>). Taxonomic profiling  
9 was done by MetaPhlan2, and genes were annotated to UniRef90 and metabolic pathways to  
10 the MetaCyc database. Whole-genome sequences of cultured *Enterococcus* isolates were  
11 analyzed by a metagenome web-based analysis tool provided by Pathosystems Resource  
12 Integration Center (PATRIC v3.5.27) (<https://www.patricbrc.org>). In detail, raw Illumina HiSeq  
13 reads were quality-filtered by Trimmomatic (version 0.36), and the quality was assessed by  
14 FastQC (version 0.11.5). The genome assembly service by PATRIC was used to assemble the  
15 reads into contigs. The genome annotation tool was applied to provide annotation of contigs to  
16 genomic features using RASTtk. Annotation is done against BLASTN, BLAT, FIGfam collection  
17 and SEED databases to compute taxonomy and proteins (42). Metabolic pathway modeling was  
18 done by ModelSEED v2.4 ([modelseed.org](http://modelseed.org)).

19 *IgA-BugFACS.* Following a previously published protocol (43), 100 mg of fecal contents were  
20 homogenized in PBS on ice. Clarified supernatants were washed in PBS/1% bovine serum  
21 albumin and incubated with blocking buffer (20% normal mouse serum in PBS) for 20 min.  
22 Samples were subsequently stained with anti-mouse IgA (clone mA06E1, ebioscience) or isotype  
23 (rat IgG1 isotype) and, subsequently, co-stained with SYBR I (Invitrogen). Flow sorting was done  
24 in using an FACS Aria device (BD Biosciences) under aseptic conditions of laminar air flow.  
25 Sorted fractions were then 16S sequenced as described above. The IgA-coating index (ICI) was  
26 calculated using the relative abundance for each individual taxon as  $ICI = (\log(IgA+) -$   
27  $\log(IgA-)) / (\log(IgA+) + \log(IgA-))$  as described previously (43, 44).

28

### 29 **Short chain fatty acids (SCFAs) analyses**

30 *GCMS for human fecal sample analyses.* Samples were weighed into 2 mL microtubes containing  
31 2.8 mm ceramic beads (Omni International). Extraction solvent containing butyric acid-d7 internal  
32 standard (Cambridge Isotope Laboratories) in 80% MeOH (Fisher Scientific) was added to the  
33 tubes at a ratio of 100 mg sample (wet weight) to 900  $\mu$ L of extraction solvent. Samples were  
34 homogenized using a Bead Ruptor homogenizer (Omni International) at 6 M/s for 30 s for a total

1 of 6 cycles with 0.01 s dwell time at 4 C°. Samples were centrifuged for 20 minutes at 20,000 x g  
2 at 4°C. A 100 µL aliquot of extract supernatant was added to 100 µL of 100 mM borate Buffer (pH  
3 10), 400 µL of 100 mM pentafluorobenzyl bromide (Thermo Scientific) in acetone (Fisher  
4 Scientific), and 400 µL of cyclohexane (Acros Organics) in a sealed autosampler vial. Samples  
5 were heated to 65°C for 1 hour with shaking. After cooling to room temperature and allowing the  
6 layers to separate, 50 µL of the cyclohexane supernatant was added to a 450 µL cyclohexane in  
7 an autosampler vial and sealed. 1 µL of the cyclohexane supernatant was analyzed by GCMS  
8 (Agilent 7890A GC system, Agilent 5975C MS detector) operating in negative chemical ionization  
9 mode, using methane as the reagent gas. Analysis was performed using Mass Hunter GCMS  
10 Quantitative Analysis (Version B.09.00, Agilent Technologies) software. Raw peak areas for  
11 butyrate were normalized to the butyric acid-d7 internal standard and quantified from a calibration  
12 curve ranging from 0.2-100 mM butyrate.

13 *h-NMR for mouse cecal sample analyses.* Butyrate concentrations from cecal contents of allo-  
14 HCT mice were determined by 1H-NMR spectroscopy using an UNITY INOVA 600 NMR  
15 spectrometer (Varian) as previously described (10). Spectra were analyzed using the Chenomix  
16 NMR software.

17

### 18 **GVHD histopathology**

19 Small and large intestines, liver, and skin samples were harvested after allo-HCT. After fixation in  
20 10% formalin, embedding in paraffin and sectioning at 5 µm, H&E staining, as well as Ki67 and  
21 CD3 immunohistochemical (IHC) and TUNEL stainings were performed by the Laboratory of  
22 Comparative Pathology facility at MSKCC. IHC was performed on a Leica Bond RX automated  
23 stainer (Leica Biosystems, Buffalo Grove, IL) following standard manufacturer's instructions  
24 except for the following details. Heat induced epitope retrieval was performed in a pH 6.0 (CD3)  
25 or 9.0 (ki67) buffer, and the primary antibody, anti-CD3 rabbit monoclonal antibody, clone SP162,  
26 ab 135372, or anti-ki67 rabbit monoclonal antibody, clone SP6, ab16667, Abcam, Cambridge,  
27 MA, was applied at a concentration of 1:250 and 1:100, respectively, and was followed by  
28 application of a polymer detection system (DS9800, Novocastra Bond Polymer Refine Detection,  
29 Leica Biosystems). The chromogen was 3,3 diaminobenzidine tetrachloride (DAB), and sections  
30 were counterstained with hematoxylin. TUNEL staining was performed as previously described  
31 (45). Slides were examined by a board-certified veterinary pathologist (S.M.) who was blinded to  
32 group treatments during evaluation. Each mouse received a score (from 0 to 4 ["none" to  
33 "marked"]) for each of the following parameters. Small intestine: villus blunting, crypt hyperplasia  
34 (Ki67), crypt apoptosis (TUNEL), crypt loss, lamina propria fibrosis, CD3+ cells, and mucosal

1 ulceration. Large intestine: mucosal erosion, crypt hyperplasia (Ki67), crypt apoptosis (TUNEL),  
2 crypt loss, lamina propria fibrosis, CD3+ cells, and mucosal ulceration. Liver: portal CD3+ cells,  
3 bile duct CD3+ cells, bile duct apoptosis, bile duct sloughing, vascular endothelitis, hepatocyte  
4 apoptosis, parenchymal CD3+ cells, parenchymal mitoses, hepatocellular cholestasis, and  
5 hepatocellular steatosis. Skin: epithelial and follicular apoptosis, epidermal basal cell vacuolation,  
6 epidermal and dermal CD3+ infiltrates. Based on these individual scores, a sum organ-specific  
7 GVHD and a compound total score were calculated to evaluate evidence for GVHD (46).  
8 Representative histopathological microphotographs are presented in **Figure S4b**.

9

### 10 **Gnotobiotic experiment with minimal community**

11 Germ-free mice were colonized with a minimal community of six bacterial strains (*Akkermansia*  
12 *muciniphila*, *Lactobacillus johnsonii*, *Blautia producta*, *Bacteroides sartorii*, *Clostridium bolteae*,  
13 and *Parabacteroides distasonis*) 21 days before allo-HCT. *Blautia producta*, *Bacteroides sartorii*,  
14 *Clostridium bolteae*, *Parabacteroides distasonis* were previously described by Caballero *et al.*  
15 (19). Bacteria were individually cultured on Columbia plus 5% sheep blood agar (BD Biosciences)  
16 for 3 days at 37°C under anaerobic conditions. *Lactobacillus johnsonii* was isolated previously  
17 from our group from feces of GHVD mice (18) and grown on MRS agars (BD Biosciences) for 3  
18 days at 37°C under anaerobic conditions. *Akkermansia muciniphila* was obtained from ATCC  
19 (strain BAA-835) and anaerobically cultured for 3 days according to ATCC recommendations.  
20 Plate cultures were scraped off, mixed in a 1:1 ratio, freshly resuspended in sterile PBS and  
21 gavaged to mice ( $\sim 1 \times 10^7$  CFUs/isolate in 200  $\mu$ l per mouse). In general, these strains represent  
22 major phyla of the mouse gut, and have previously been reported to modulate enterococci  
23 colonization in mice (*Blautia*), or to characterize GVHD-associated dysbiosis (*Akkermansia*,  
24 *Lactobacillus*) (10, 18, 19). One group of colonized mice was spiked with p.o. *E. faecalis* OG1RF  
25 ( $2 \times 10^7$  CFUs per mouse) two days after 6-strain colonization.

26

### 27 **Statistical analyses**

28 Survival analysis was performed using R package *survival* and *cmprsk*. The cumulative  
29 incidences of graft-versus-host disease (GVHD), relapse or progression of disease, and GVHD-  
30 related mortality (GRM) were estimated using cumulative incidence functions accounting for the  
31 corresponding competing risks. The competing risks for GVHD were relapse and death, and for  
32 relapse it was death without relapse. The competing risks for GRM were relapse and death  
33 without GVHD. Cox proportional hazards multivariable regression models (*coxph*) were used to  
34 assess associations between *Enterococcus* domination or lactase genotypes and outcomes

1 (survival). Estimates and comparisons across groups were based on a landmark time point  
2 among patients without the event by day +21. Patients with T-cell-depleted grafts were excluded  
3 from analyses of clinical outcomes. Domination was defined as any OTU with relative abundance  
4  $\geq 0.3$ , a threshold that we have previously used to define domination (35). The samples were  
5 binned into 7-day sliding windows in accordance with the approximately weekly collection  
6 schedule. The domination cumulative incidence plot considers patients with at least one evaluable  
7 sample at pre-HCT and one at post-HCT time. The fraction of patients in whom at least one  
8 instance of domination was detected by the given time is plotted. In the analyses of bacterial  
9 metagenomes, we used the linear discriminant analysis of effect size (LEfSe), a bioinformatics  
10 tool that identifies differentially abundant features between microbial communities (47).  
11 Correlation statistics were performed using Kendall's Tau rank correlation. For two group  
12 comparisons in mouse experiments, we applied independent or dependent T-tests, Wilcoxon  
13 rank-sum or signed-rank tests, or the AUC-Vardi test (48). Statistical significance was determined  
14 based on p-values  $< 0.05$ .

15

#### 16 **Data Availability**

17 Sequencing data are deposited into SRA under Bioproject number PRJNA545312.

18

19

1 **Table S1**  
2

|                                   | Overall Cohort |
|-----------------------------------|----------------|
| Overall N                         | 1325           |
| <b>Institution (%)</b>            |                |
| MSKCC                             | 1101 (83.1)    |
| Regensburg                        | 79 (6.0)       |
| Duke                              | 79 (6.0)       |
| Hokkaido                          | 66 (5.0)       |
| Age at HCT, year (mean (sd))      | 52.9 (12.8)    |
| Sex = (male, %)                   | 801 (60.5)     |
| <b>Disease (%)</b>                |                |
| AML                               | 485 (36.6)     |
| MDS/MPN                           | 244 (18.4)     |
| NHL                               | 223 (16.8)     |
| ALL                               | 124 (9.4)      |
| Myeloma                           | 113 (8.5)      |
| CLL                               | 33 (2.5)       |
| CML                               | 29 (2.2)       |
| Hodgkins                          | 30 (2.3)       |
| AA                                | 9 (0.7)        |
| other                             | 35 (2.6)       |
| <b>Graft type (%)</b>             |                |
| BM/PBSC unmodified                | 660 (49.8)     |
| cord                              | 207 (15.6)     |
| PBSC T-cell Depleted              | 458 (34.6)     |
| <b>Conditioning intensity (%)</b> |                |
| Ablative                          | 744 (56.2)     |
| Reduced Intensity                 | 466 (35.2)     |
| Nonmyeloablative                  | 115 (8.7)      |

3  
4  
5  
6  
7  
8  
9  
10  
11  
12  
13

**Supplementary Table S1.** Clinical characteristics of the overall cohort used in the analysis of microbiome composition. MSKCC, Memorial Sloan Kettering Cancer Center; The multicenter validation cohort was comprised of Duke, Regensburg, and Hokkaido; HCT, hematopoietic cell transplantation; AML, acute myeloid leukemia; MDS/MPN, myelodysplastic syndromes/myeloproliferative neoplasms; NHL, Non-Hodgkin Lymphomas; ALL, acute lymphoid leukemia; CLL, chronic lymphocytic leukemia; CML, chronic myeloid leukemia; AA, aplastic anemia; BM, bone marrow; PBSC, peripheral blood stem cells; sd, standard deviation.

1 **Table S2**  
2

| Species                             | mean pre HCT | mean post- HCT max | delta of means | p value   | FDR adjusted |
|-------------------------------------|--------------|--------------------|----------------|-----------|--------------|
| <i>Enterococcus faecium</i>         | 4.79E-02     | 3.19E-01           | 2.72E-01       | 1.47E-103 | 2.93E-102    |
| <i>Enterococcus rivorum</i>         | 2.49E-04     | 1.10E-03           | 8.47E-04       | 4.45E-83  | 4.45E-82     |
| <i>Enterococcus mundtii</i>         | 8.37E-05     | 1.05E-03           | 9.65E-04       | 2.57E-58  | 1.72E-57     |
| <i>Enterococcus lactis</i>          | 2.25E-04     | 7.22E-04           | 4.97E-04       | 2.00E-54  | 1.00E-53     |
| <i>Enterococcus moraviensis</i>     | 4.02E-05     | 1.21E-04           | 8.09E-05       | 3.22E-28  | 1.29E-27     |
| <i>Enterococcus gallinarum</i>      | 1.04E-04     | 2.12E-04           | 1.07E-04       | 1.45E-22  | 4.82E-22     |
| <i>Enterococcus cecorum</i>         | 3.62E-06     | 9.08E-04           | 9.04E-04       | 2.39E-21  | 6.83E-21     |
| <i>Enterococcus durans</i>          | 2.43E-06     | 5.07E-05           | 4.82E-05       | 1.53E-09  | 3.83E-09     |
| <i>Enterococcus faecalis</i>        | 8.87E-07     | 8.10E-06           | 7.21E-06       | 2.65E-09  | 5.89E-09     |
| <i>Enterococcus ureasiticus</i>     | 1.28E-05     | 2.64E-05           | 1.36E-05       | 9.16E-08  | 1.83E-07     |
| <i>Enterococcus silesiacus</i>      | 2.18E-07     | 2.02E-06           | 1.81E-06       | 1.38E-05  | 2.50E-05     |
| <i>Enterococcus saccharolyticus</i> | 3.49E-07     | 1.97E-06           | 1.62E-06       | 1.37E-04  | 2.28E-04     |
| <i>Enterococcus sp. CR-303S</i>     | 6.72E-08     | 1.09E-06           | 1.02E-06       | 5.13E-04  | 7.89E-04     |
| <i>Enterococcus sp. DME</i>         | 2.29E-09     | 1.01E-06           | 1.01E-06       | 1.37E-03  | 1.95E-03     |
| <i>Enterococcus canis</i>           | 1.81E-07     | 1.15E-06           | 9.64E-07       | 1.08E-01  | 1.44E-01     |
| <i>Enterococcus sp. DJF SLA47</i>   | 2.76E-08     | 2.42E-07           | 2.14E-07       | 1.81E-01  | 2.27E-01     |
| <i>Enterococcus malodoratus</i>     | 2.45E-07     | 1.03E-06           | 7.89E-07       | 2.81E-01  | 3.30E-01     |
| <i>Enterococcus sp. 4</i>           | 6.16E-08     | 3.90E-07           | 3.28E-07       | 7.26E-01  | 8.07E-01     |

3  
4  
5 **Supplementary Table S2.** FDR-adjusted differences in median *Enterococcus spp.* abundances pre- vs. post-HCT are  
6 presented for the overall cohort. For this analysis, the 18 species with non-zero abundance in any pre-HCT sample  
7 were included. Pre-HCT abundance was defined as each patient's first sample in a window of day -30 to -6; post-HCT  
8 abundance was calculated as each patient's maximum abundance in a window of day 0 to 21. A Wilcoxon rank test  
9 with FDR correction was applied. Also tabulated are the mean of the pre-HCT abundances, the mean of the post-HCT-  
10 maximum abundances, and the difference (delta) between the means.  
11  
12  
13



1 **Table S3**  
2

|                                        | <b>Non-dominated</b> | <b>Dominated</b> | <b>p-value</b> | <b>Non-dominated</b>                 | <b>Dominated</b> | <b>p-value</b> |
|----------------------------------------|----------------------|------------------|----------------|--------------------------------------|------------------|----------------|
| <b>Cohort, N (overall)</b>             | MSKCC, 538 patients  |                  |                | Multicenter validation, 167 patients |                  |                |
| <b>N (non-dominated vs. dominated)</b> | 389                  | 149              |                | 113                                  | 54               |                |
| <b>Age at HCT, year (mean (sd))</b>    | 54.48 (13.30)        | 53.75 (12.87)    | 0.56           | 49.60 (12.94)                        | 49.49 (13.83)    | 0.96           |
| <b>Sex (male, %)</b>                   | 241 (62.0)           | 96 (64.4)        | 0.67           | 74 (65.5)                            | 33 (61.1)        | 0.71           |
| <b>Disease (%)</b>                     |                      |                  | <0.001         |                                      |                  | 0.51           |
| <b>AML</b>                             | 96 (24.7)            | 84 (56.4)        |                | 45 (39.8)                            | 29 (53.7)        |                |
| <b>MDS/MPN</b>                         | 65 (16.7)            | 14 (9.4)         |                | 21 (18.6)                            | 7 (13.0)         |                |
| <b>NHL</b>                             | 134 (34.4)           | 21 (14.1)        |                | 17 (15.0)                            | 5 (9.3)          |                |
| <b>ALL</b>                             | 24 (6.2)             | 17 (11.4)        |                | 14 (12.4)                            | 9 (16.7)         |                |
| <b>Myeloma</b>                         | 2 (0.5)              | 0 (0.0)          |                | 8 (7.1)                              | 0 (0.0)          |                |
| <b>CLL</b>                             | 22 (5.7)             | 3 (2.0)          |                | 2 (1.8)                              | 1 (1.9)          |                |
| <b>Hodgkins</b>                        | 20 (5.1)             | 2 (1.3)          |                | 1 (0.9)                              | 1 (1.9)          |                |
| <b>CML</b>                             | 9 (2.3)              | 3 (2.0)          |                | 2 (1.8)                              | 1 (1.9)          |                |
| <b>AA</b>                              | 4 (1.0)              | 0 (0.0)          |                | 2 (1.8)                              | 1 (1.9)          |                |
| <b>other</b>                           | 13 (3.3)             | 5 (3.4)          |                | 1 (0.9)                              | 0 (0.0)          |                |
| <b>Graft type (%)</b>                  |                      |                  | 0.03           |                                      |                  | 0.17           |
| <b>BM/PBSC unmodified</b>              | 289 (74.3)           | 96 (64.4)        |                | 97 (85.8)                            | 51 (94.4)        |                |
| <b>cord</b>                            | 100 (25.7)           | 53 (35.6)        |                | 16 (14.2)                            | 3 (5.6)          |                |
| <b>Conditioning intensity (%)</b>      |                      |                  | 0.10           |                                      |                  | 0.32           |
| <b>Ablative</b>                        | 88 (22.6)            | 40 (26.8)        |                | 68 (60.2)                            | 26 (48.1)        |                |
| <b>Reduced Intensity</b>               | 224 (57.6)           | 91 (61.1)        |                | 44 (38.9)                            | 27 (50.0)        |                |
| <b>Nonmyeloablative</b>                | 77 (19.8)            | 18 (12.1)        |                | 1 (0.9)                              | 1 (1.9)          |                |

3  
4  
5 **Supplementary Table S3.** Clinical characteristics of the sub-cohort used in analysis of clinical outcomes. MSKCC,  
6 Memorial Sloan Kettering Cancer Center; multicenter validation cohort, transplant centers at Duke, Regensburg,  
7 Hokkaido; HCT, hematopoietic cell transplantation; AML, acute myeloid leukemia; MDS/MPN, myelodysplastic  
8 syndromes/myeloproliferative neoplasms; NHL, Non-Hodgkin Lymphomas; ALL, acute lymphoid leukemia; CLL,  
9 chronic lymphocytic leukemia; CML, chronic myeloid leukemia; AA, aplastic anemia; BM, bone marrow; PBSC,  
10 peripheral blood stem cells; cord, cord blood; sd, standard deviation.  
11  
12  
13

1 **Table S4**  
2

| Enterococcus<br>threshold (rel. abundance) | MSKCC cohort        |         |                     |         |
|--------------------------------------------|---------------------|---------|---------------------|---------|
|                                            | Univariate          |         | Multivariate        |         |
|                                            | HR (95% CI)         | p value | HR (95% CI)         | p value |
| <b>≥0.3</b>                                |                     |         |                     |         |
| OS                                         | 1.97 (1.45 to 2.66) | <0.0001 | 2.06 (1.50 to 2.82) | <0.0001 |
| GRM                                        | 2.04 (1.18 to 3.52) | <0.05   | 2.60 (1.46 to 4.62) | <0.01   |
| GVHD (Grade 2-4)                           | 1.44 (1.10 to 1.88) | <0.01   | 1.32 (1.00 to 1.75) | <0.05   |

3  
4  
5  
6  
7  
8  
9  
10

**Supplementary Table S4.** Univariate and multivariate analysis of *Enterococcus* domination and the outcomes of survival (OS), GVHD-related mortality (GRM) and acute GVHD grade 2-4 in the MSKCC patient cohort. The multivariate Cox models were adjusted for graft source, age, conditioning intensity, gender, and underlying disease (leukemia vs. other).

1 **Table S5**  
2

| Genus                  | Domination Frequency |        | Genus                  | Domination Frequency |        |
|------------------------|----------------------|--------|------------------------|----------------------|--------|
|                        | Mean                 | Median |                        | Mean                 | Median |
| <b>Duke</b>            |                      |        | <b>MSKCC</b>           |                      |        |
| Enterococcus           | 0.131                | 0.135  | Enterococcus           | 0.218                | 0.29   |
| Streptococcus          | 0.102                | 0.095  | Streptococcus          | 0.073                | 0.094  |
| Lactobacillus          | 0.099                | 0.09   | Eubacterium            | 0.04                 | 0.051  |
| Akkermansia            | 0.097                | 0.069  | Lactobacillus          | 0.039                | 0.047  |
| Blautia                | 0.082                | 0.076  | Blautia                | 0.034                | 0.029  |
| Klebsiella             | 0.035                | 0.043  | Erysipelatoclostridium | 0.028                | 0.027  |
| Megasphaera            | 0.035                | 0.035  | Staphylococcus         | 0.021                | 0.021  |
| Parabacteroides        | 0.035                | 0.027  | Klebsiella             | 0.02                 | 0.017  |
| Bacteroides            | 0.032                | 0.032  | Akkermansia            | 0.016                | 0.009  |
| Erysipelatoclostridium | 0.031                | 0.045  | Escherichia            | 0.015                | 0.014  |
| Pediococcus            | 0.031                | 0.03   | Clostridium            | 0.014                | 0.014  |
| Eubacterium            | 0.03                 | 0.03   | Pediococcus            | 0.012                | 0.015  |
| Escherichia            | 0.028                | 0.022  | Actinomyces            | 0.01                 | 0.007  |
| Staphylococcus         | 0.027                | 0.021  | Lactococcus            | 0.01                 | 0.009  |
| Leuconostoc            | 0.024                | 0.024  | Bacteroides            | 0.008                | 0.011  |
| Scardovia              | 0.024                | 0.024  | Bifidobacterium        | 0.008                | 0.003  |
| Clostridium            | 0.023                | 0.022  | Parabacteroides        | 0.007                | 0.006  |
| Enterobacter           | 0.021                | 0.021  | Veillonella            | 0.006                | 0.005  |
| <b>Hokkaido</b>        |                      |        | <b>Regensburg</b>      |                      |        |
| Enterococcus           | 0.497                | 0.521  | Enterococcus           | 0.453                | 0.329  |
| Clostridium            | 0.165                | 0.059  | Eubacterium            | 0.096                | 0.076  |
| Akkermansia            | 0.133                | 0.14   | Akkermansia            | 0.073                | 0.073  |
| Eubacterium            | 0.093                | 0.086  | Streptococcus          | 0.057                | 0.067  |
| Streptococcus          | 0.066                | 0.033  | Staphylococcus         | 0.054                | 0.054  |
| Lactobacillus          | 0.061                | 0.083  | Erysipelatoclostridium | 0.046                | 0.046  |
| Staphylococcus         | 0.061                | 0.061  | Parabacteroides        | 0.033                | 0.033  |
| Bifidobacterium        | 0.051                | 0.051  | Escherichia            | 0.032                | 0.032  |
| Leuconostoc            | 0.042                | 0.042  | Faecalibacterium       | 0.028                | 0.028  |
| Pediococcus            | 0.042                | 0.042  | Blautia                | 0.022                | 0      |
| Klebsiella             | 0.041                | 0.041  | Clostridium            | 0.016                | 0      |
| Erysipelatoclostridium | 0.04                 | 0.04   | Coprococcus            | 0.014                | 0.016  |
| Megamonas              | 0.033                | 0.033  | Bacteroides            | 0.012                | 0.012  |
| Blautia                | 0.026                | 0.026  | Ruminococcus           | 0.006                | 0      |
| Ruminococcus           | 0.017                | 0.026  | [Clostridium]          | 0                    | 0      |
| Faecalibacterium       | 0.005                | 0      | Coprobacillus          | 0                    | 0      |
| Bacillus               | 0                    | 0      | Klebsiella             | 0                    | 0      |
| Bacteroides            | 0                    | 0      | Oscillospira           | 0                    | 0      |

3  
4  
5 **Supplementary Table S5.** The most commonly dominating genus was *Enterococcus*. Tabulated are the frequencies  
6 of samples with domination events attributed to each genus that are also plotted in **Figure S3b**. The mean and median  
7 frequency of samples dominated by each genus across the time windows (vertical bars of **Figure S3b**) is tabulated.  
8 For example, among samples collected from the Duke cohort, the mean frequency of domination by *Enterococcus* over  
9 time was 13.1%. The top 18 genera within each cohort are shown.

10  
11

1  
2

**Table S6**

MSKCC cohort

| Genera                        | pre-HCT   | post-HCT  | p value  | FDR adjusted |
|-------------------------------|-----------|-----------|----------|--------------|
| Streptococcus                 | 0.009584  | 0.117621  | 4.77E-38 | 2.96E-50     |
| Enterococcus                  | 0.002072  | 0.026001  | 4.87E-50 | 3.12E-62     |
| Clostridium                   | 0.114629  | 0.025575  | 1        | 1            |
| Lactobacillus                 | 0.001135  | 0.025010  | 1.64E-49 | 1.03E-61     |
| Eubacterium                   | 0.022226  | 0.018278  | 0.186210 | 1            |
| Blautia                       | 0.177585  | 0.015736  | 1        | 1            |
| Actinomyces                   | 0.001059  | 0.007879  | 1.67E-24 | 9.36E-37     |
| Ruminococcus                  | 0.107578  | 0.005834  | 1        | 1            |
| Veillonella                   | 0.000144  | 0.003551  | 2.56E-50 | 1.66E-62     |
| Bacteroides                   | 0.004375  | 0.002965  | 0.509099 | 1            |
| Erysipelatoclostridium        | 0.006779  | 0.002697  | 0.448567 | 1            |
| Faecalibacterium              | 0.024954  | 0.001367  | 1        | 1            |
| Rothia                        | 5.63E-05  | 0.001317  | 9.72E-37 | 5.93E-49     |
| Parascardovia                 | 0.000209  | 0.0012722 | 1.73E-18 | 9.33E-31     |
| Staphylococcus                | 5.44E-05  | 0.001075  | 1.15E-58 | 7.60E-71     |
| Lactococcus                   | 0.000186  | 0.000978  | 3.06E-15 | 1.59E-27     |
| Bifidobacterium               | 0.007026  | 0.000957  | 1        | 1            |
| Oscillospira                  | 0.005133  | 0.000861  | 1        | 1            |
| Coprococcus                   | 0.024411  | 0.000764  | 1        | 1            |
| unclassified                  | 0.000393  | 0.000763  | 0.000278 | 0.008885     |
| Dorea                         | 0.014056  | 0.000648  | 1        | 1            |
| Escherichia                   | 0.000255  | 0.000595  | 1.02E-08 | 3.68E-07     |
| Akkermansia                   | 0.000206  | 0.000485  | 4.60E-09 | 1.70E-07     |
| Klebsiella                    | 0.000206  | 0.000467  | 4.68E-15 | 1.87E-13     |
| Granulicatella                | 4.53E-05  | 0.000460  | 3.95E-44 | 2.29E-42     |
| Scardovia                     | 0         | 0.000367  | 6.29E-46 | 3.71E-44     |
| Atopobium                     | 8.81E-06  | 0.000363  | 7.04E-43 | 4.01E-41     |
| Parabacteroides               | 0.000288  | 0.000351  | 0.005805 | 0.741493     |
| Roseburia                     | 0.007539  | 0.000296  | 1        | 1            |
| Pediococcus                   | 9.29E-06  | 0.000277  | 3.13E-24 | 1.60E-22     |
| Gemella                       | 5.16E-05  | 0.000274  | 5.59E-21 | 2.68E-19     |
| Peptostreptococcus            | 3.77E-05  | 0.000256  | 4.33E-23 | 2.12E-21     |
| Coprobacillus                 | 0.000963  | 0.000225  | 1        | 1            |
| Megasphaera                   | 0         | 0.000173  | 3.75E-32 | 1.99E-30     |
| Mogibacterium                 | 3.39E-05  | 0.000161  | 3.83E-13 | 1.49E-11     |
| unclas. Peptostreptococcaceae | 0.0002531 | 0.000157  | 0.929596 | 1            |
| Propionibacterium             | 0         | 0.000154  | 6.75E-47 | 4.05E-45     |
| Corynebacterium               | 0         | 0.000143  | 1.34E-34 | 7.38E-33     |
| Phascolarctobacterium         | 3.40E-05  | 0.000134  | 6.57E-06 | 0.000217     |
| Butyrivibrio                  | 2.25E-05  | 0.000112  | 5.12E-08 | 1.75E-06     |
| Clostridium                   | 0.000605  | 0.000111  | 1        | 1            |
| Leuconostoc                   | 0         | 9.19E-05  | 7.53E-16 | 3.16E-14     |
| Prevotella                    | 0         | 9.02E-05  | 3.19E-15 | 1.31E-13     |
| Turicibacter                  | 6.28E-05  | 8.71E-05  | 0.250066 | 1            |
| Weissella                     | 0         | 8.71E-05  | 1.39E-19 | 6.40E-18     |
| Alistipes                     | 4.63E-05  | 7.10E-05  | 0.350451 | 1            |
| Eggerthella                   | 0.000345  | 5.84E-05  | 1        | 1            |
| Fusobacterium                 | 0         | 4.10E-05  | 6.62E-20 | 3.11E-18     |
| Enterobacter                  | 0         | 3.57E-05  | 5.01E-08 | 1.75E-06     |
| Sutterella                    | 0         | 3.14E-05  | 0.001565 | 0.048501     |
| Abiotrophia                   | 0         | 1.15E-05  | 7.15E-24 | 3.57E-22     |
| Adlercreutzia                 | 0         | 0         | 0.999698 | 1            |
| Allobaculum                   | 0         | 0         | 4.91E-18 | 2.16E-16     |
| Anaerococcus                  | 0         | 0         | 0.045427 | 1            |
| Anaerofustis                  | 0         | 0         | 0.999978 | 1            |
| Anaeroplasmia                 | 0         | 0         | 9.12E-10 | 3.46E-08     |
| Anaerostipes                  | 3.56E-05  | 0         | 0.999998 | 1            |
| Anaerotruncus                 | 0         | 0         | 1        | 1            |
| Bifidobacterium               | 0         | 0         | 0.594937 | 1            |
| Collinsella                   | 0         | 0         | 0.991462 | 1            |
| Dehalobacterium               | 0         | 0         | 0.902237 | 1            |
| Dialister                     | 0         | 0         | 0.999772 | 1            |
| Holdemania                    | 0         | 0         | 0.999936 | 1            |
| Lachnobacterium               | 0         | 0         | 1        | 1            |
| Mycoplasma                    | 0         | 0         | 5.22E-17 | 2.24E-15     |
| Oribacterium                  | 0         | 0         | 2.53E-19 | 1.14E-17     |

Multicenter validation cohort:

| Genera                        | pre-HCT  | post-HCT | p value  | FDR adjusted |
|-------------------------------|----------|----------|----------|--------------|
| Enterococcus                  | 0.014575 | 0.036330 | 0.000328 | 0.021348     |
| Clostridium                   | 0.089745 | 0.021384 | 0.994378 | 1            |
| Streptococcus                 | 0.009601 | 0.015100 | 0.036976 | 1            |
| Eubacterium                   | 0.010862 | 0.012890 | 0.125806 | 1            |
| Lactobacillus                 | 0.009066 | 0.009271 | 0.381552 | 1            |
| Blautia                       | 0.036646 | 0.007191 | 0.948537 | 1            |
| Ruminococcus                  | 0.041457 | 0.006115 | 0.983023 | 1            |
| Faecalibacterium              | 0.014595 | 0.004206 | 0.999133 | 1            |
| Staphylococcus                | 0.000182 | 0.003645 | 5.50E-12 | 3.63E-10     |
| Bacteroides                   | 0.005864 | 0.003385 | 0.822737 | 1            |
| Erysipelatoclostridium        | 0.000285 | 0.002928 | 0.018971 | 1            |
| Coprococcus                   | 0.005156 | 0.001285 | 0.973864 | 1            |
| Akkermansia                   | 0.000571 | 0.001215 | 0.228781 | 1            |
| Dorea                         | 0.001380 | 0.000945 | 0.532264 | 1            |
| Oscillospira                  | 0.005900 | 0.000788 | 0.998562 | 1            |
| unclassified                  | 0.001110 | 0.000664 | 0.817973 | 1            |
| Parabacteroides               | 0.000449 | 0.000629 | 0.674802 | 1            |
| Lactococcus                   | 0.000000 | 0.000526 | 0.000462 | 0.029596     |
| Roseburia                     | 0.001125 | 0.000526 | 0.902407 | 1            |
| Escherichia                   | 0.000586 | 0.000455 | 0.965396 | 1            |
| Bifidobacterium               | 0.002037 | 0.000416 | 0.999639 | 1            |
| Klebsiella                    | 0.000391 | 0.000308 | 0.945188 | 1            |
| Actinomyces                   | 0.000294 | 0.000285 | 0.570908 | 1            |
| Coprobacillus                 | 1.84E-05 | 0.000249 | 0.50710  | 1            |
| Veillonella                   | 0.000681 | 0.000222 | 0.999123 | 1            |
| Clostridium                   | 5.53E-05 | 0.000165 | 0.174948 | 1            |
| Pediococcus                   | 5.92E-05 | 0.000114 | 0.281845 | 1            |
| Propionibacterium             | 0        | 6.40E-05 | 0.001645 | 0.101963     |
| Leuconostoc                   | 0        | 3.70E-05 | 0.147866 | 1            |
| Abiotrophia                   | 0        | 0        | 0.382553 | 1            |
| Adlercreutzia                 | 0        | 0        | 0.713186 | 1            |
| Alistipes                     | 0        | 0        | 0.534649 | 1            |
| Allobaculum                   | 0        | 0        | 0.001036 | 0.065287     |
| Anaerococcus                  | 0        | 0        | 0.983413 | 1            |
| Anaerofustis                  | 0        | 0        | 0.301359 | 1            |
| Anaeroplasmia                 | 0        | 0        | 0.065151 | 1            |
| Anaerostipes                  | 0        | 0        | 0.997931 | 1            |
| Anaerotruncus                 | 0        | 0        | 0.997181 | 1            |
| Atopobium                     | 0        | 0        | 0.698718 | 1            |
| Bifidobacterium               | 0        | 0        | 0.193525 | 1            |
| Butyrivibrio                  | 8.69E-05 | 0        | 0.993740 | 1            |
| Collinsella                   | 0        | 0        | 0.029315 | 1            |
| Corynebacterium               | 0        | 0        | 0.036327 | 1            |
| Dehalobacterium               | 0        | 0        | 0.477840 | 1            |
| Dialister                     | 7.40E-05 | 0        | 1        | 1            |
| Eggerthella                   | 0        | 0        | 0.741851 | 1            |
| Enterobacter                  | 0        | 0        | 0.752952 | 1            |
| Fusobacterium                 | 0        | 0        | 0.433932 | 1            |
| Gemella                       | 0        | 0        | 0.213045 | 1            |
| Granulicatella                | 0        | 0        | 0.569902 | 1            |
| Holdemania                    | 0        | 0        | 0.833104 | 1            |
| Lachnobacterium               | 0        | 0        | 0.995089 | 1            |
| Megasphaera                   | 4.86E-05 | 0        | 0.996650 | 1            |
| Mogibacterium                 | 0        | 0        | 0.349363 | 1            |
| Mycoplasma                    | 0        | 0        | 0.041193 | 1            |
| Oribacterium                  | 0        | 0        | 0.899635 | 1            |
| Parascardovia                 | 0        | 0        | 0.366910 | 1            |
| Peptostreptococcus            | 0        | 0        | 0.179367 | 1            |
| Phascolarctobacterium         | 0        | 0        | 0.490673 | 1            |
| Prevotella                    | 0        | 0        | 0.711281 | 1            |
| Rothia                        | 0        | 0        | 0.08097  | 1            |
| Scardovia                     | 0        | 0        | 0.515801 | 1            |
| Sutterella                    | 5.19E-05 | 0        | 0.962346 | 1            |
| Turicibacter                  | 0.000191 | 0        | 0.99996  | 1            |
| Weissella                     | 0        | 0        | 0.280937 | 1            |
| unclas. Peptostreptococcaceae | 0        | 0        | 0.895275 | 1            |

3  
4  
5  
6  
7

**Supplementary Table S6.** FDR-adjusted differences in median genera abundances pre- vs. post-HCT are presented for the MSKCC and the multicenter validation cohorts. For this analysis, the 66 genera that had a relative abundance over  $10^{-4}$  in at least 10% of the samples were included. Pre-HCT abundance was defined as each patient's first sample

1 in a window of day -30 to -6; post-HCT abundance was calculated as each patient's maximum abundance in a window  
 2 of day 0 to 21. A Wilcoxon rank test with FDR correction was applied.  
 3  
 4  
 5  
 6  
 7

8 **Table S7**  
 9

| <b>Genera</b>                 | <b>BM</b> | <b>BM+T</b> | <b>p value</b> | <b>FDR</b> |
|-------------------------------|-----------|-------------|----------------|------------|
| Akkermansia                   | 0.2461    | 0.0691      | 0.008          | 0.049      |
| Ruminococcus                  | 0.0586    | 0.0177      | 0.008          | 0.049      |
| Clostridium                   | 0.3265    | 0.1303      | 0.008          | 0.049      |
| Enterococcus                  | 0.0016    | 0.4064      | 0.008          | 0.049      |
| Oscillospira                  | 0.0150    | 0.0035      | 0.016          | 0.066      |
| Adlercreutzia                 | 0.0020    | 0.0004      | 0.016          | 0.066      |
| Dehalobacterium               | 0.0011    | 0.0000      | 0.025          | 0.079      |
| Anaerostipes                  | 0.0004    | 0.0000      | 0.025          | 0.079      |
| Coprobacillus                 | 0.0108    | 0.0711      | 0.056          | 0.139      |
| Coprococcus                   | 0.0078    | 0.0018      | 0.056          | 0.139      |
| Lachnobacterium               | 0.0010    | 0.0000      | 0.072          | 0.150      |
| Turicibacter                  | 0.0000    | 0.0053      | 0.072          | 0.150      |
| Bacteroides                   | 0.0019    | 0.0001      | 0.139          | 0.267      |
| Enterobacter                  | 0.0002    | 0.1213      | 0.151          | 0.269      |
| Staphylococcus                | 0.0002    | 0.0022      | 0.161          | 0.269      |
| unclas. Peptostreptococcaceae | 0.0009    | 0.0028      | 0.346          | 0.540      |
| Anaerotruncus                 | 0.0002    | 0.0006      | 0.389          | 0.552      |
| Butyrivibrio                  | 0.0041    | 0.0007      | 0.398          | 0.552      |
| Roseburia                     | 0.0005    | 0.0000      | 0.424          | 0.558      |
| Dorea                         | 0.0006    | 0.0001      | 0.526          | 0.657      |
| Blautia                       | 0.0014    | 0.0031      | 0.600          | 0.690      |
| Mycoplasma                    | 0.0000    | 0.0001      | 0.607          | 0.690      |
| Anaeroplasm                   | 0.0019    | 0.0010      | 0.666          | 0.724      |
| Lactobacillus                 | 0.0726    | 0.1190      | 0.841          | 0.876      |
| Streptococcus                 | 0.0001    | 0.0001      | 0.906          | 0.906      |

10  
 11  
 12 **Supplementary Table S7.** Table presenting median relative abundances of individual taxa (day 8 after allo-HCT) in  
 13 BM vs BM+T mice top-ranked according to relative abundance levels; statistical testing by Kruskal-Wallis rank  
 14 comparison, adjusted by FDR correction.  
 15  
 16  
 17  
 18  
 19  
 20  
 21  
 22

1 **Table S8**  
2

|                          | <b>Control diet</b>                                                                                                                                                                                                                                                                                                                          | <b>Lactose-free diet</b>                                                                                                                                                                                                                                                                                                                      |
|--------------------------|----------------------------------------------------------------------------------------------------------------------------------------------------------------------------------------------------------------------------------------------------------------------------------------------------------------------------------------------|-----------------------------------------------------------------------------------------------------------------------------------------------------------------------------------------------------------------------------------------------------------------------------------------------------------------------------------------------|
| Vendor                   | LabDiet                                                                                                                                                                                                                                                                                                                                      | LabDiet                                                                                                                                                                                                                                                                                                                                       |
| Catalogue #              | 5053<br>irradiated                                                                                                                                                                                                                                                                                                                           | 5WEV (modified after 5053, no added dried whey)<br>irradiated                                                                                                                                                                                                                                                                                 |
| Nutrients (%)            | Protein 21.0<br>Fat (ether extract) 5.0<br>Fat (acid hydrolysis) 6.3<br><br>Fiber 4.6<br>Neutral detergent fiber 16.0<br>Acid detergent fiber 5.8<br><br>Nitrogen-Free extract 53.4<br>Starch 28.2<br>Sucrose 3.25<br><br>Minerals 5.9                                                                                                       | Protein 21.0<br>Fat (ether extract) 5.2<br>Fat (acid hydrolysis) 5.8<br><br>Fiber 4.6<br>Neutral detergent fiber 15.6<br>Acid detergent fiber 5.8<br><br>Nitrogen-Free extract 53.5<br>Starch 30.0<br>Sucrose 3.37<br><br>Minerals 5.7                                                                                                        |
| Vitamins                 | Carotene (ppm) 1.5<br>Vitamin A (IU/g) 15<br>Vitamin D (IU/g) 2.3<br>Vitamin E (IU/kg) 99<br>Vitamin K (ppm) 3.3<br>Thiamin (ppm) 17<br>Riboflavin (ppm) 8.0<br>Niacin (ppm) 85<br>Panthothenic acid (ppm) 17<br>Folic acid (ppm) 3.0<br>Pyridoxine (ppm) 9.6<br>Biotin (ppm) 0.3<br>Vitamin B12 (mcg/kg) 51<br>Choline chloride (ppm) 2,000 | Carotene (ppm) 1.6<br>Vitamin A (IU/g) 15<br>Vitamin D (IU/g) 2.3<br>Vitamin E (IU/kg) 101<br>Vitamin K (ppm) 3.3<br>Thiamin (ppm) 16<br>Riboflavin (ppm) 2.4<br>Niacin (ppm) 88<br>Panthothenic acid (ppm) 17<br>Folic acid (ppm) 3.0<br>Pyridoxine (ppm) 9.6<br>Biotin (ppm) 0.3<br>Vitamin B12 (mcg/kg) 51<br>Choline chloride (ppm) 2,000 |
| Calories (%) provided by | Protein 24.5<br>Fat 13.1<br>Carbohydrates 62.4                                                                                                                                                                                                                                                                                               | Protein 24.4<br>Fat 13.5<br>Carbohydrates 62.1                                                                                                                                                                                                                                                                                                |

3  
4  
5 **Supplementary Table S8.** Ingredients of the conventional laboratory mouse diet at MSKCC that was used as a control  
6 diet vs. lactose-free diet for feeding mice in allo-HCT experiments.  
7

1 **Table S9**  
2

| Genera                        | Ctr    | LF     | p value | FDR   |
|-------------------------------|--------|--------|---------|-------|
| Clostridium                   | 0.0774 | 0.2803 | 0.001   | 0.049 |
| unclas. Peptostreptococcaceae | 0.0002 | 0.0012 | 0.003   | 0.049 |
| Oscillospira                  | 0.0067 | 0.0338 | 0.004   | 0.049 |
| Lactobacillus                 | 0.0249 | 0.0586 | 0.010   | 0.089 |
| Lachnobacterium               | 0.0003 | 0.0000 | 0.013   | 0.089 |
| rc4.4                         | 0.0418 | 0.0410 | 0.017   | 0.089 |
| Anaerostipes                  | 0.0002 | 0.0015 | 0.025   | 0.104 |
| Leuconostoc                   | 0.0000 | 0.0000 | 0.026   | 0.104 |
| Coprococcus                   | 0.0011 | 0.0028 | 0.055   | 0.198 |
| Sutterella                    | 0.0354 | 0.0165 | 0.065   | 0.214 |
| Olsenella                     | 0.0000 | 0.0001 | 0.146   | 0.386 |
| Prevotella                    | 0.0000 | 0.0000 | 0.146   | 0.386 |
| Butyrivibrio                  | 0.0000 | 0.0000 | 0.155   | 0.386 |
| Bacteroides                   | 0.0329 | 0.0174 | 0.182   | 0.386 |
| Bifidobacterium               | 0.0008 | 0.0022 | 0.191   | 0.386 |
| Streptococcus                 | 0.0000 | 0.0000 | 0.193   | 0.386 |
| Lactococcus                   | 0.0000 | 0.0000 | 0.193   | 0.386 |
| Adlercreutzia                 | 0.0012 | 0.0033 | 0.211   | 0.400 |
| Ruminococcus                  | 0.0100 | 0.0130 | 0.243   | 0.434 |
| Anaerofustis                  | 0.0000 | 0.0000 | 0.277   | 0.434 |
| Akkermansia                   | 0.3457 | 0.2141 | 0.278   | 0.434 |
| Dehalobacterium               | 0.0006 | 0.0009 | 0.278   | 0.434 |
| Blautia                       | 0.0004 | 0.0000 | 0.303   | 0.437 |
| Anaeroplasma                  | 0.0037 | 0.0013 | 0.315   | 0.437 |
| Allobaculum                   | 0.0003 | 0.0005 | 0.315   | 0.437 |
| Staphylococcus                | 0.0001 | 0.0000 | 0.477   | 0.636 |
| Filifactor                    | 0.0001 | 0.0000 | 0.517   | 0.665 |
| Paraprevotella                | 0.0000 | 0.0000 | 0.563   | 0.699 |
| Anaerotruncus                 | 0.0002 | 0.0002 | 0.652   | 0.758 |
| Candidatus_Arthromitus        | 0.0000 | 0.0000 | 0.656   | 0.758 |
| Dorea                         | 0.0000 | 0.0000 | 0.674   | 0.758 |
| Propionibacterium             | 0.0000 | 0.0001 | 0.775   | 0.845 |
| Coprobacillus                 | 0.0005 | 0.0004 | 0.902   | 0.955 |
| Chlamydia                     | 0.0001 | 0.0002 | 0.935   | 0.962 |
| Turicibacter                  | 0.0215 | 0.0197 | 0.968   | 0.968 |

3  
4  
5  
6  
7  
8  
9  
10  
11  
12  
13  
14

**Supplementary Table S9.** Comparison of relative abundances of taxa at genus level in GVHD mice at day 7 after T cell replete transplants that received either control (Ctr) or lactose-free chow (LF) [LP/J → C57BL/6 allo-HCT]; ranking according to magnitude of differences; see Figure 4b for relative abundance plot of the genus *Enterococcus*. Feeding of LF to transplanted mice was associated with increased abundances of *Clostridium*, *Oscillospira* and unclassified peptostreptococci (after FRD adjustment). Statistical testing by Kruskal-Wallis rank comparisons adjusted by FDR correction.

1 **Table S10**  
2

| Protocol        | Target                    | TaqMan ID     | Species |
|-----------------|---------------------------|---------------|---------|
| Gene expression | Reg3B                     | Mm00440616_g1 | mouse   |
|                 | Reg3G                     | Mm00441127_m1 | mouse   |
|                 | lactase                   | Mm01285112_m1 | mouse   |
|                 | GAPDH                     | Mm99999915_g1 | mouse   |
| SNP genotyping  | rs4988235, C/T(-1390) SNP |               | human   |

3  
4  
5



Supplementary Figure 1

a

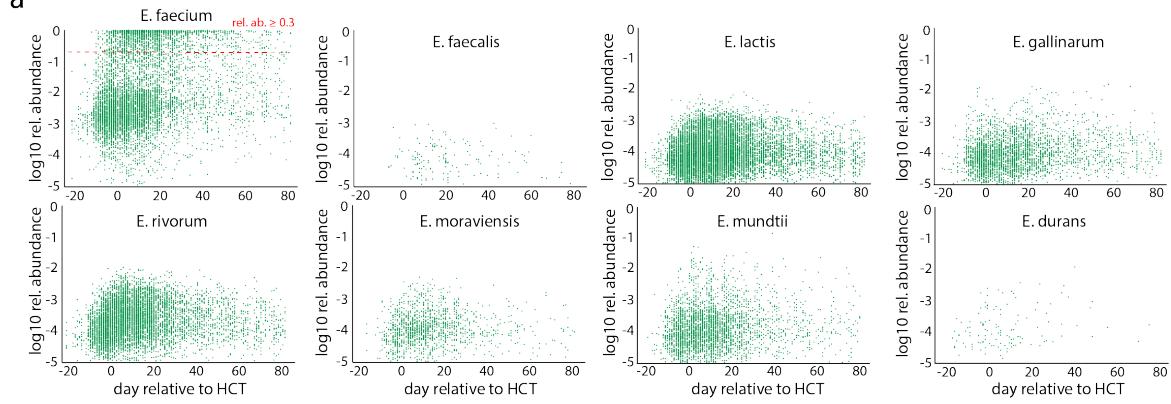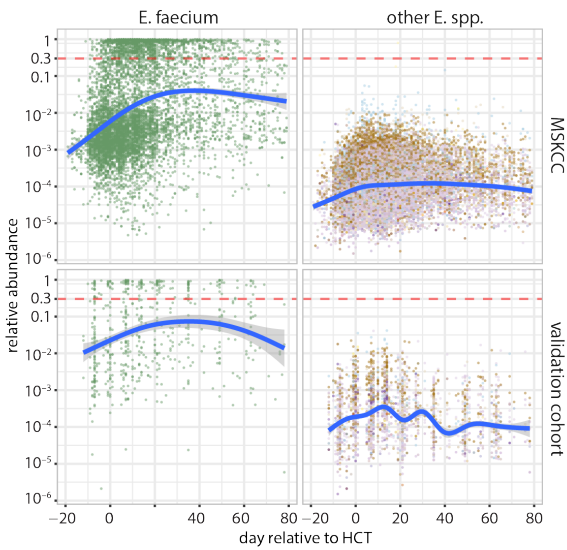

b

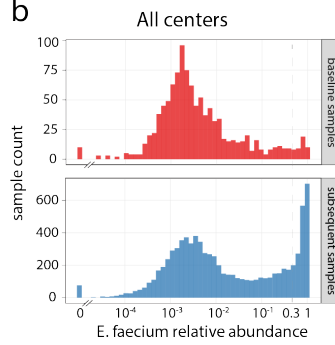

c Fold-change from baseline

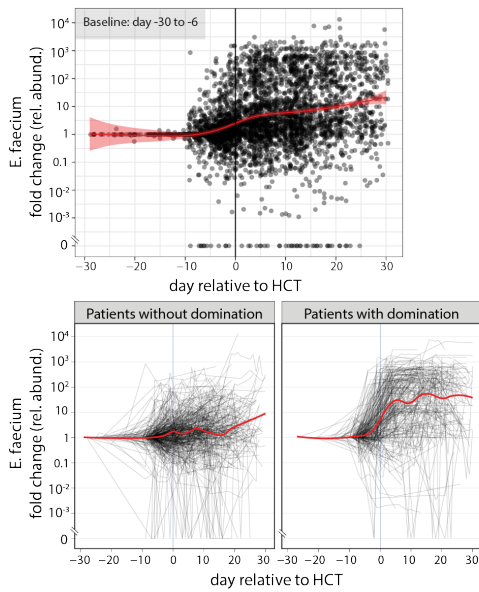

Individual centers

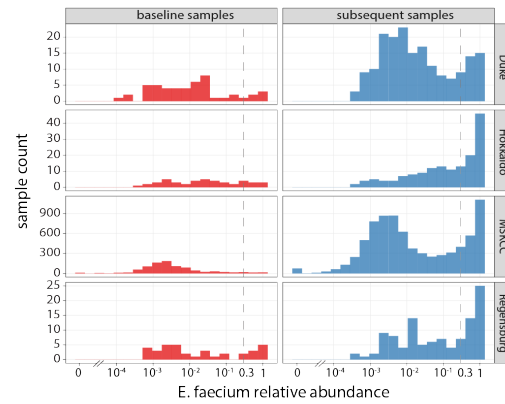

|            | N with baseline samples | N (%) undetectable | N (%) $\geq 0.3$ |
|------------|-------------------------|--------------------|------------------|
| Duke       | 49                      | 0                  | 5 (10.2%)        |
| Hokkaido   | 44                      | 0                  | 9 (20.5%)        |
| MSKCC      | 930                     | 10 (1.1%)          | 37 (4.0%)        |
| Regensburg | 36                      | 0                  | 9 (25.0%)        |
| Total      | 1059                    | 10 (0.9%)          | 60 (5.7%)        |

1  
2 **Supplementary Figure 1.** (a) *Top 8 panels:* Relative abundance ( $\log_{10}$  transformed) of *Enterococcus spp.* in fecal  
3 samples of MSKCC patients collected at different time points relative to allo-HCT (dotted line indicates domination  
4 threshold at 0.3 relative abundance). *Bottom 4 panels:* A version of **Figure 1b** plotted on a  $\log_{10}$  vertical axis that  
5 extends to a relative abundance of  $10^{-6}$ . A quantitative analysis of all species within genus *Enterococcus* is tabulated  
6 in **Supplemental Table S2**. (b) In baseline samples (first sample per patient collected between days -30 and -6), most  
7 samples had a low level of *E. faecium* abundance in a unimodal distribution centered at  $\sim 10^{-3}$ . *E. faecium* was  
8 undetectable in 10 (0.9%) samples, and domination with *E. faecium* was observed in 60 (5.7%) of baseline samples.  
9 In subsequent samples, *E. faecium* abundance developed into a bimodal distribution with a second peak of samples  
10 with relative abundances above the domination threshold. *Top*, histograms of relative abundance of *E. faecium* at  
11 baseline and in the subsequent samples using merged data of all centers (MSKCC and multicenter-validation cohort;  
12 dotted line indicates domination threshold at 0.3 rel. abundance); *Middle*, distribution analysis for each center  
13 individually; *Bottom*, tabulated numbers of patients at each center with either undetectable or already-dominated  
14 samples at baseline. (c) Analysis of *E. faecium* expansion expressed as fold-change normalized to each patient's  
15 baseline sample. *Top*, *E. faecium* fold-change in 4,039 samples from 563 patients who had a baseline sample collected  
16 between day -30 and day -6 and at least one subsequent sample collected up to day +30. Ten patients had undetectable  
17 *E. faecium* abundance in baseline samples (i.e, zero rel. abundance); a small constant ( $1 \times 10^{-4}$ ) was added to all  
18 samples to allow fold-change calculations. Both fold-increases and fold-decreases were observed; considering all  
19 samples collected between days 14-21, *E. faecium* abundance increased by a median of 6.4-fold and by a mean of  
20 143.6-fold. *Bottom*, the same data are plotted with a trendline for each patient and in separate panels for those patients  
21 who became dominated vs. those who did not. Considering all samples collected between days 14-21 from patients  
22 who became dominated at some point, *E. faecium* increased by a median of 120-fold and a mean of 332-fold.  
23 Considering all samples collected in the same time period from patients who never became dominated, *E. faecium*  
24 increased by a median of 2-fold and a mean of 55.6-fold. In all panels, blue and red lines indicate smoothed average  
25 trends.

Supplementary Figure 2

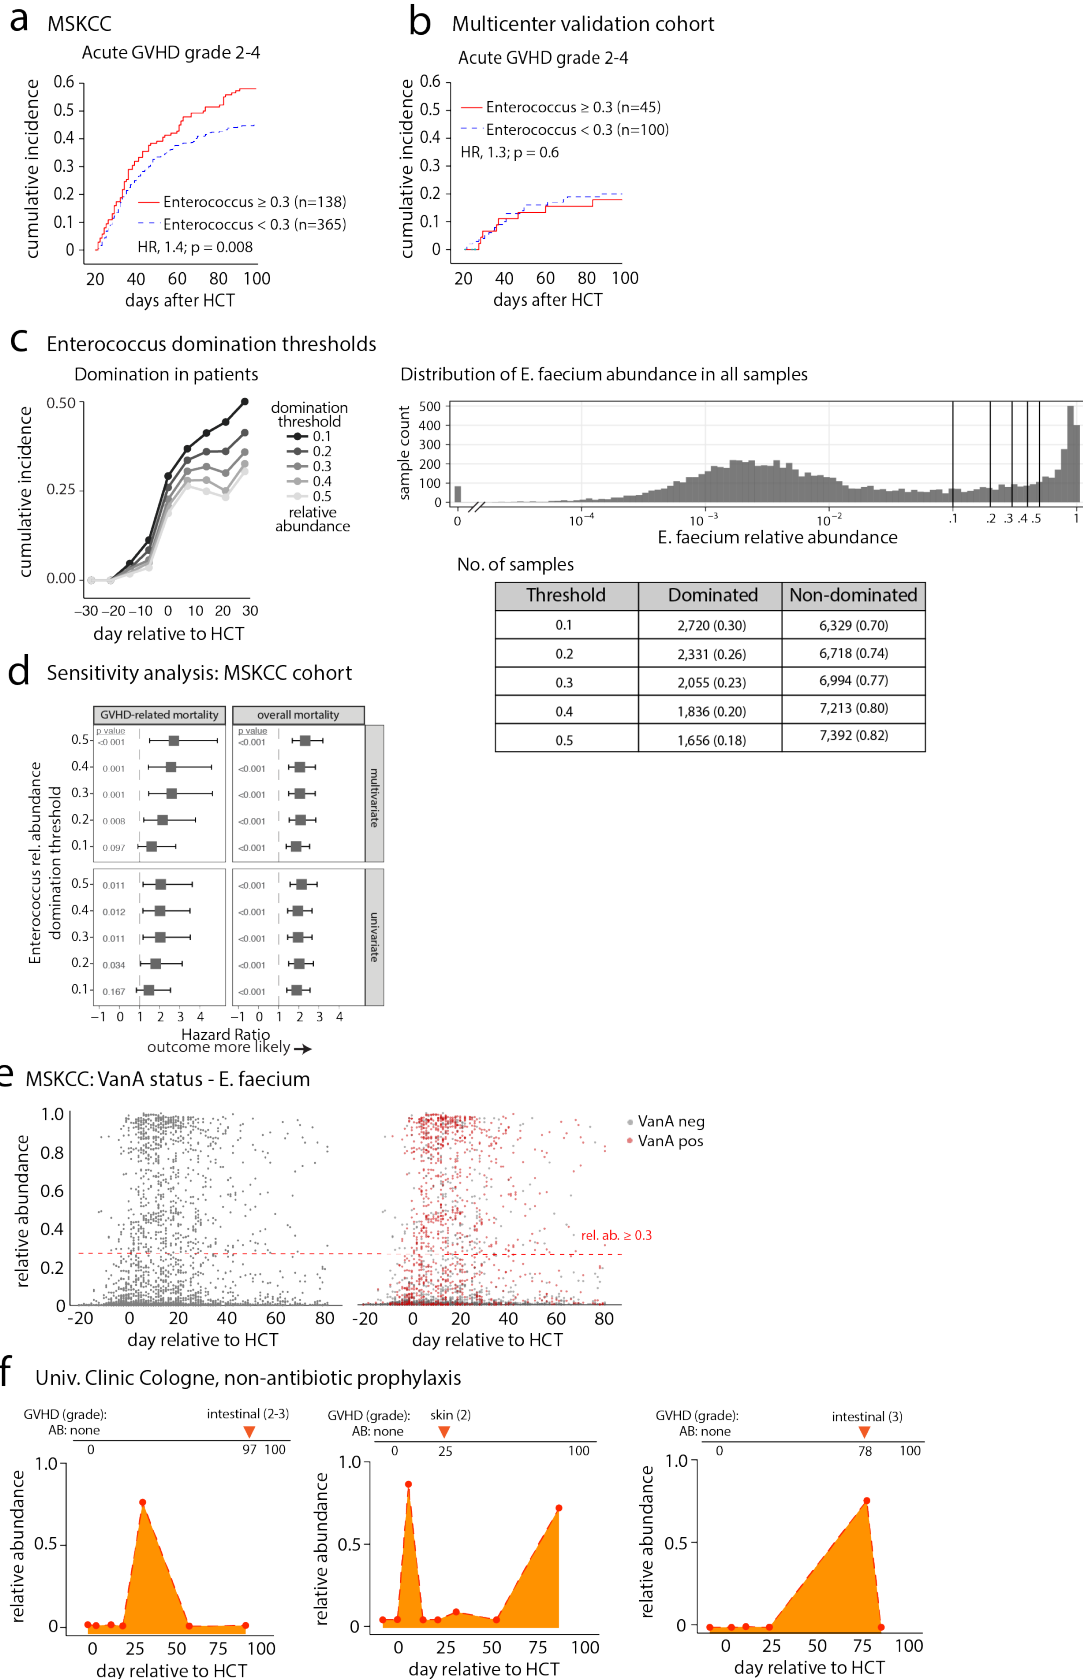

1 **Supplementary Figure 2.** (a) Cumulative incidence of grade 2-4 acute GVHD (landmark analysis of survivors beyond  
2 day +21) in MSKCC patients with genus *Enterococcus* domination vs. non-domination. (b) Cumulative incidence grade  
3 2-4 acute GVHD in the multicenter validation cohort. (c) Domination threshold sensitivity analysis with the total dataset  
4 for the cumulative incidence of *Enterococcus* domination. *Left*, the cumulative incidence of domination dramatically  
5 increases around day 0 and then reaches a plateau with relatively similar kinetics across all tested threshold definitions,  
6 although the height of the plateau varies with the definition such that fewer patients are considered to have had  
7 domination events at higher, more stringent thresholds. *Right upper*, distribution of *E. faecium* relative abundances in  
8 the entire dataset with the cut-offs tested in the sensitivity analysis indicated. *Right lower*, the number of samples in the  
9 entire dataset that would be defined as dominated by *E. faecium* at each cut-off tested. (d) Sensitivity analysis for the  
10 association of genus *Enterococcus* domination with GVHD-related mortality and overall survival: The domination  
11 predicts higher risk of all-cause mortality with high statistical significance at all tested domination thresholds and in both  
12 univariate and multivariate Cox models. Genus *Enterococcus* domination also predicts GVHD-related mortality at  
13 thresholds between 0.2 and 0.5, although in the lowest, least stringent threshold of 0.1, there was no longer a significant  
14 association for this outcome. The multivariate Cox models were adjusted for graft source, age, conditioning intensity,  
15 gender, and underlying disease (leukemia vs. other). (e) In a subset of 3,833 samples from 406 patients, presence of  
16 the VanA gene in fecal samples was assessed by PCRs. 152 patients were *vanA* positive (i.e., vancomycin resistant),  
17 and among them 115 patients had stool samples with a relative abundance of *E. faecium*  $\geq 0.3$  (red dotted line). (f)  
18 *Enterococcus* expansion and blood-stream infections after allo-HCT have been attributed to antibiotic exposure (5, 6,  
19 49). The vast majority of patients in our study received antibiotics (prophylactic and/or therapeutic antibiotics). To  
20 explore whether enterococcal domination can occur in patients in the absence of antibiotics, we profiled fecal microbiota  
21 communities collected at University Clinic of Cologne, where samples were available from patients who did not receive  
22 prophylactic antibiotics. Presented are three anecdotal case in which genus *Enterococcus* domination was observed in  
23 allo-HCT patients who did not receive antibiotic prophylaxis nor antibiotics for treatment for neutropenic fever or  
24 infections. All three patients subsequently developed either skin or gut GVHD.

25  
26  
27  
28

Supplementary Figure 3

**a** Allo-HCT associated dynamics of high abundant genera at MSKCC

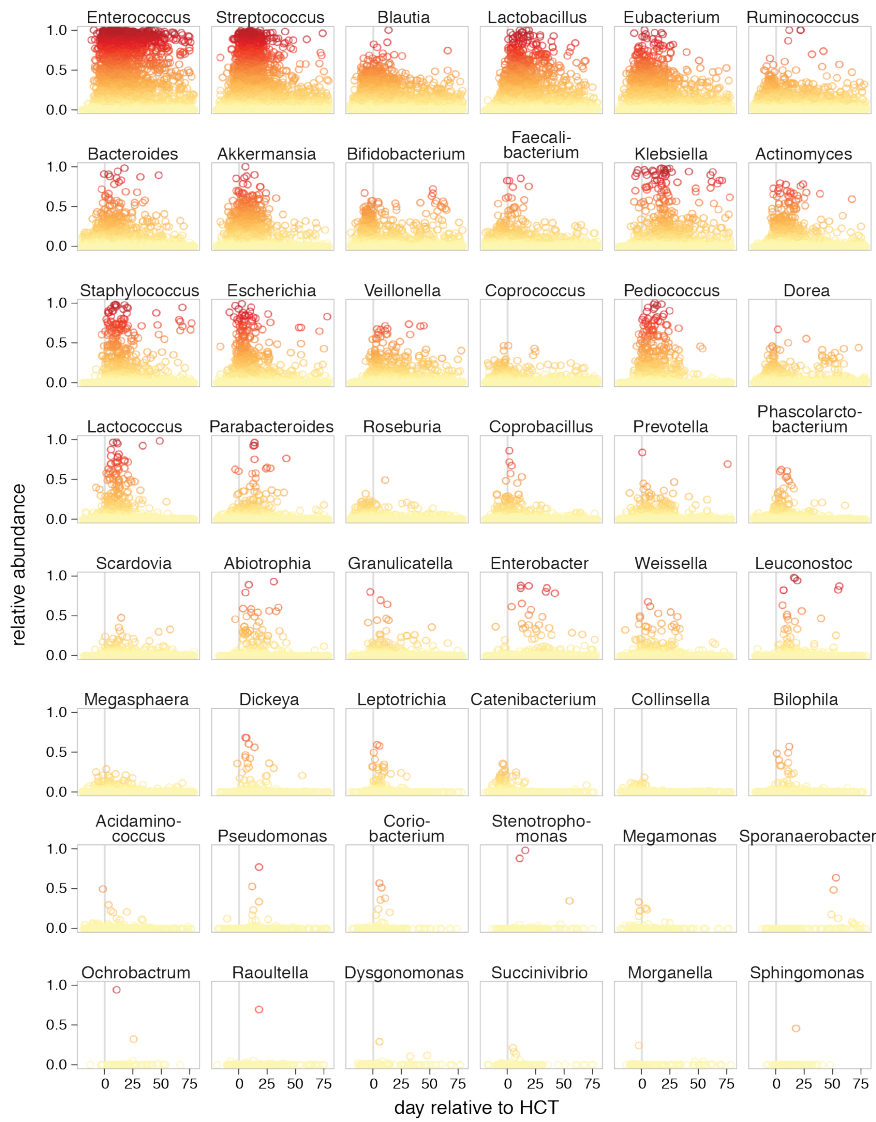

**b** Domination composition

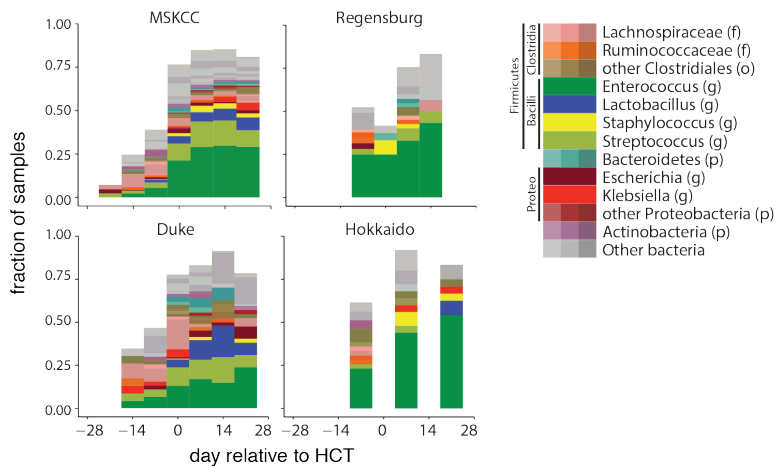

1 **Supplementary Figure 3.** (a) Relative abundance dynamics of selected genera in 7,321 fecal samples from 1056  
2 recipients of allo-HCT at MSKCC. *Enterococcus* showed the most pronounced bloom after transplantation followed by  
3 *Streptococcus*, *Blautia* and *Lactobacillus*. Plotted are the 48 genera with the highest mean abundances across all  
4 samples, in decreasing order of mean abundance. The yellow-to-red color scale recapitulates the y-axis abundance  
5 values for emphasis. (b) Taxa contributing to domination events in the MSKCC and the 3 centers in the Multicenter  
6 Validation Cohorts. Domination was defined at the level of OTUs; color-coding of higher-rank taxa is defined in the  
7 color legend. Samples were binned in 7 day-windows; bars are plotted for windows that contain at least 5 samples.  
8 The MSKCC panel includes the recipients of T-replete grafts analyzed in this study. The data plotted in these barplots  
9 are tabulated in **Supplemental Table S5**. A similar but distinct analysis of a larger cohort that included recipients of T-  
10 cell-depleted grafts is presented in a separate manuscript.  
11

12  
13  
14  
15  
16  
17

Supplementary Figure 4

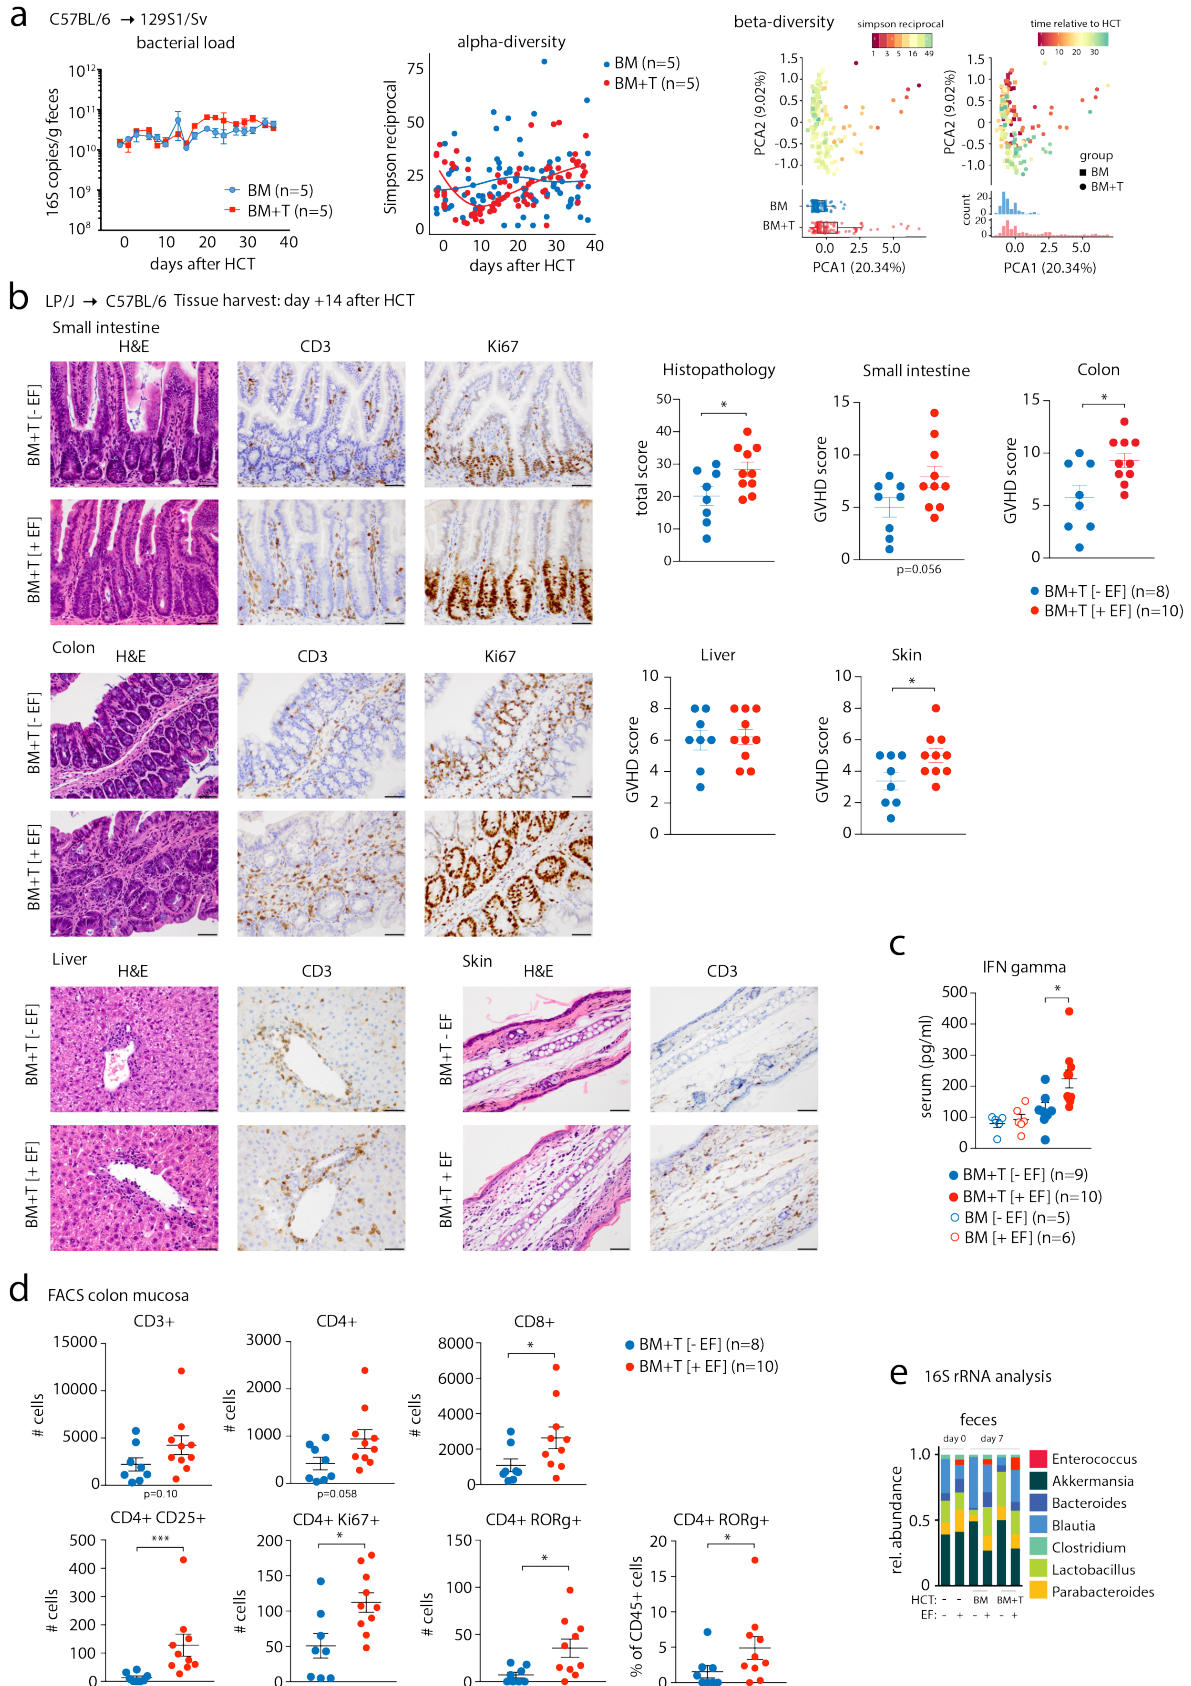

1 **Supplementary Figure 4.** (a) *Left*, in transplanted mice that develop GVHD or BM-only controls, the overall bacterial  
2 load remains relatively stable, as measured by quantitative PCR using universal 16S primers in serially collected fecal  
3 samples from 129S1/Sv recipients of C57BL/6 bone marrow (BM) or T cell-replete BM (BM+T,  $4 \times 10^6$  T cells); *Middle*,  
4 alpha diversity transiently decreases in BM+T recipients around day 10. *Right*, representation of Bray-Curtis beta-  
5 diversity in a PCoA plot. (b) Representative images of histopathological sections of several GVHD target organs in  
6 gnotobiotic C57BL/6 mice that were colonized with the bacterial 6-strain mix spiked with *E. faecalis* OG1RF in the +EF  
7 group (see **Figure 2**) and tissue was analyzed 14 days after HCT. Compound histopathological scores (including all  
8 four organs) vs. GVHD scores for each organ are displayed; the scale bars in the right lower corner represent 50 $\mu$ m.  
9 (c) Serum IFN $\gamma$  concentrations of gnotobiotic mice harvested 14 days after allo-HCT. IFN $\gamma$  is a pleiotropic cytokine that  
10 is produced in large amounts by Th1 and Tc1 cells early after HCT and is the archetypal “Th1” cytokine generated  
11 during GVHD. IFN $\gamma$  is pathogenic in the development of intestinal GVHD (50), enhancing the sensitivity of macrophages  
12 to LPS, hence increasing their production of proinflammatory cytokines (51) in addition to causing crypt hypertrophy  
13 and villous atrophy (52, 53) via direct signaling of the IFNGR expressed on recipient gut tissue (50). (d) Flow cytometric  
14 analysis of lamina propria isolates from colon tissues in the recipient gnotobiotic mice on day 14 after HCT. Number of  
15 cells per  $1 \times 10^6$  cells. Our observed increase in proliferation of CD4 $^+$  T cells is consistent with the increased infiltration  
16 of antigen-specific donor T cells, which occurs in the gastrointestinal tract of GVHD mice (16). (e) Median relative  
17 abundances of each member of the 6-strain community +/- *E. faecalis* in fecal samples collected at the day of HCT and  
18 7 days later. Data are combined from two independent experiments in b and c. Values represent mean  $\pm$  S.E.M.  
19 \* $p < 0.05$ .  
20



Supplementary Figure 5

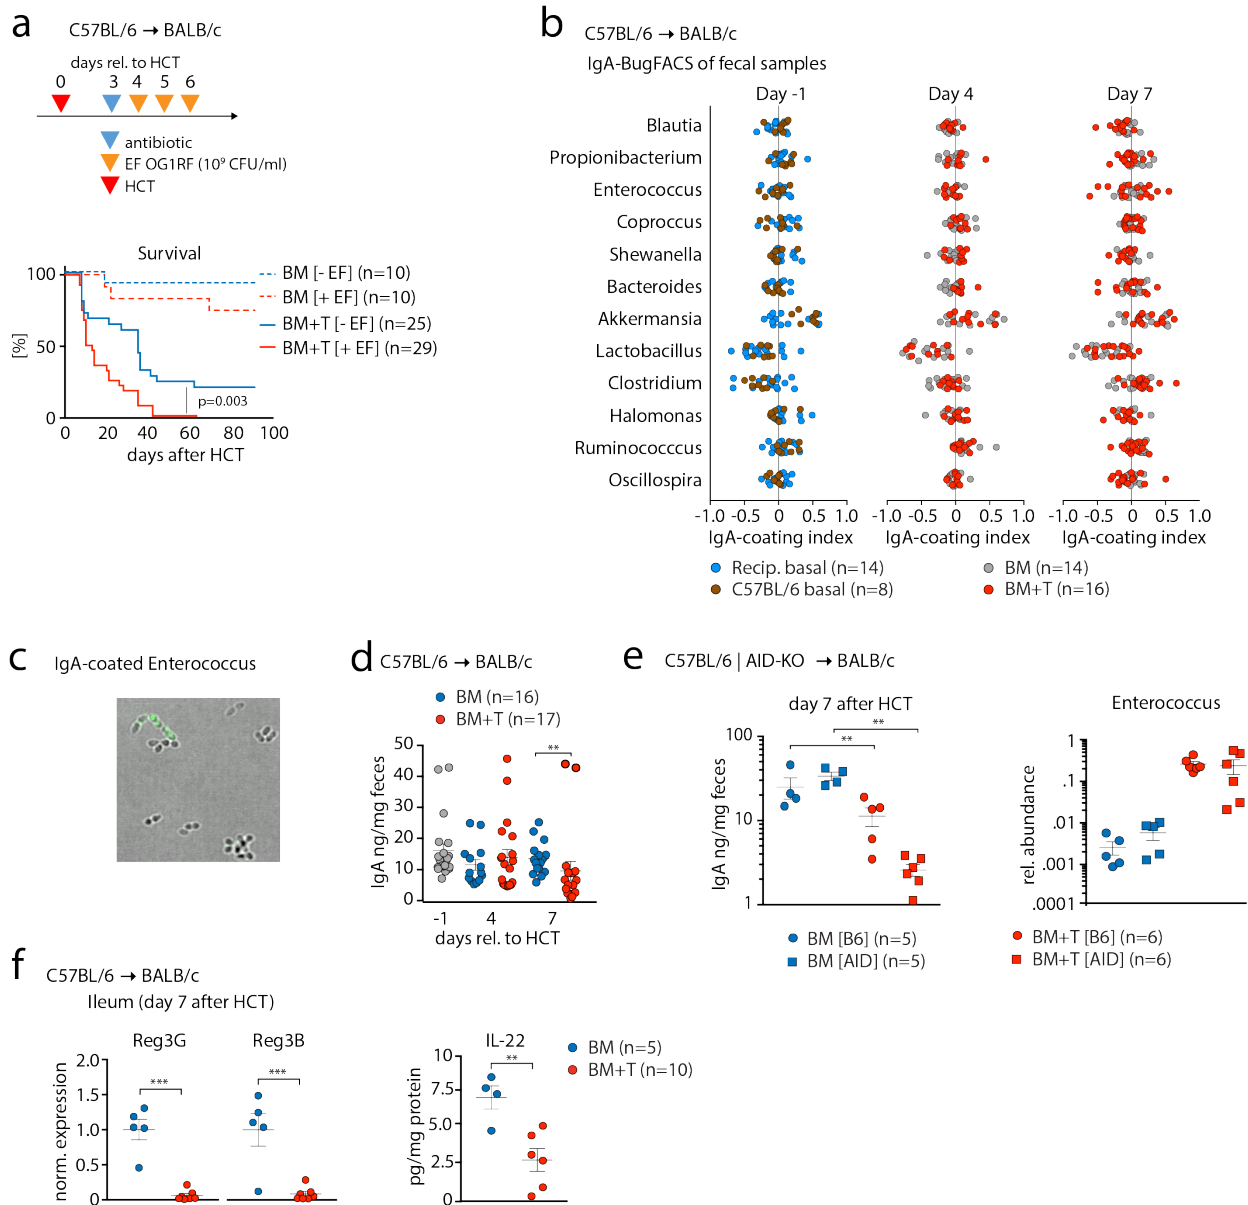

1  
2  
3  
4  
5  
6  
7  
8  
9  
10  
11  
12  
13  
14  
15  
16

**Supplementary Figure 5.** (a) Survival data combined from three experiments of BALB/c mice receiving either C57BL/6 BM or BM+T ( $5 \times 10^5$  T cells), and received oral gavages of *E. faecalis* OG1RF for three consecutive days after a one-time vancomycin (25mg/kg, p.o.) gavage to facilitate intestinal strain engraftment. (b) IgA – BugFACS on fecal samples from C57BL/6 donors and BALB/c recipients at different days relative to HCT (BM vs. BM +  $1 \times 10^6$  T cells). IgA-coating presented as IgA-coating index (ICI) for several genera (ICI 0-1: IgA+ fraction, ICI -1-0: IgA- fraction). (c) Immunofluorescence microphotograph (by confocal laser microscopy) of *E. faecalis* incubated with polyclonal human IgA and stained with anti-human IgA – Alexa 488. (d) IgA in the feces of BALB/c mice at baseline and 4 and 7 days after HCT with BM or BM+T ( $1 \times 10^6$  T cells) of C57BL/6 mice. (e) Left, IgA in the feces and, right, *Enterococcus* relative abundance in the stool of BALB/c mice transplanted with either BM or BM+T (1 Mio T cells) of wildtype C57BL/6 mice or of AID-KO mice lacking IgA. (f) mRNA expression of Reg3B and Reg3G (relative to GAPDH and normalized to BM as controls) and concentration of IL-22 (as pg protein per mg total protein) in the ileum of BALB/C mice transplanted with C57BL6 BM or BM+T ( $1 \times 10^6$  T cells). Values represent mean  $\pm$  S.E.M. \* $p < 0.05$ , \*\* $p < 0.01$ , \*\*\* $p < 0.001$  (Student's T test).

Supplementary Figure 6

a Lactose and galactose degradation pathways

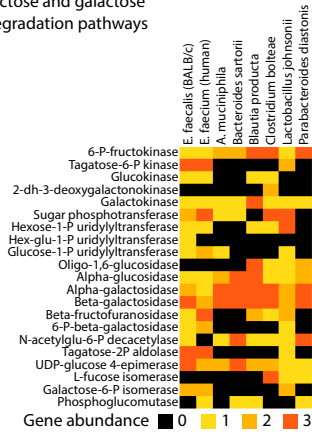

b Lactose and galactose metabolism, *E. faecalis* (BALB/c, GVHD)

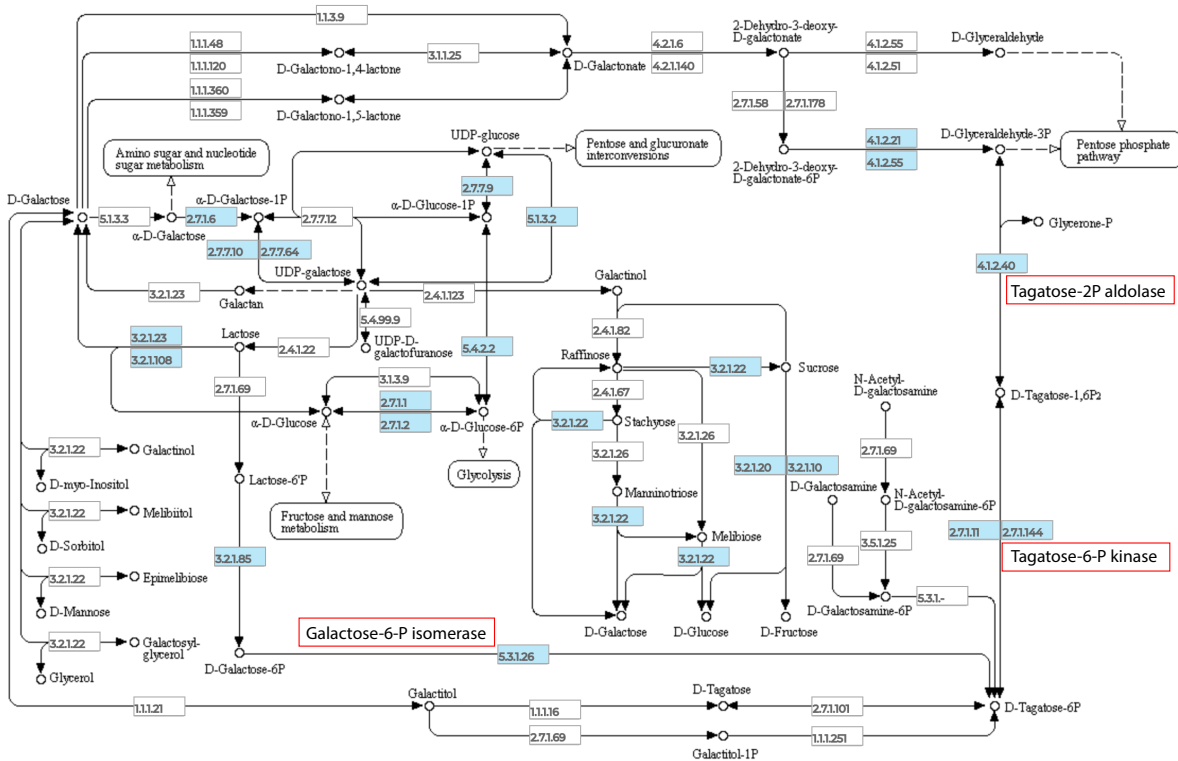

1  
2  
3  
4  
5  
6  
7  
8  
9  
10  
11  
12

**Supplementary Figure 6.** (a) Comparing the *Enterococcus* genomes (mouse GVHD and human isolate from Figure 3c) and publicly available genomes (from PATRIC 3.5.27) of other members of the gnotobiotic 6-strain consortium revealed that enterococci are enriched in enzymes for the Leior pathway (common lactose utilization), and in the tagatose pathway: Heat map of gene abundances of individual genes of the lactose and galactose degradation pathway. (b) Overview of the lactose and galactose degradation pathways in bacteria based on pathway analysis and reconstruction by ModelSEED v2.3. Highlighted in red boxes are enzymes that are predominantly found in *E. faecalis* and *E. faecium*.

1

## Supplementary Figure 7

**a** Lactose measurements media

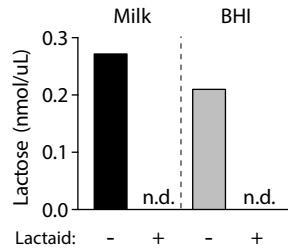

**b** Lactose measurements chow

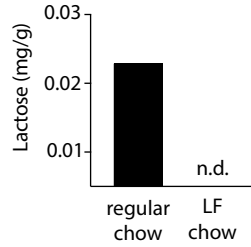

2  
3  
4  
5  
6  
7  
8  
9

**Supplementary Figure 7.** (a) Lactase treatment reduced the amount of lactose in regular milk and BHI broth to non-detectable (n.d.) concentrations; the levels of glucose were unaffected by the treatment (3 replicates: regular BHI = 178.3 mg/dl, lactase-pretreated BHI = 181.7 mg/dl). (b) Lactose contents of regular chow or lactose-free chow (5WEV) measured in chow homogenates by a fluorometric lactose assay.

# Supplementary Figure 8

**a** C57BL/6 → 129S1/Sv

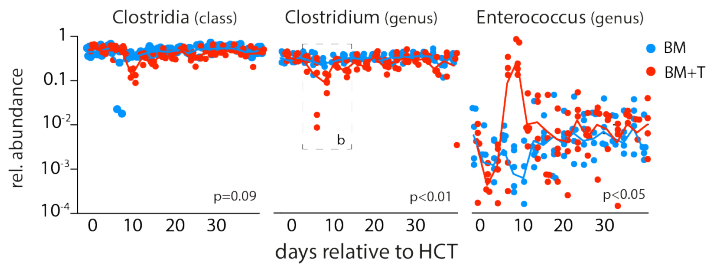

**b** Kendall tau correlation  
E. faecalis vs. Clostridia species

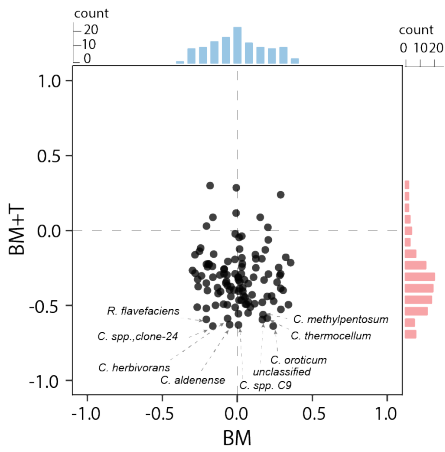

**c** Clostridia spp. (absolute abundance)

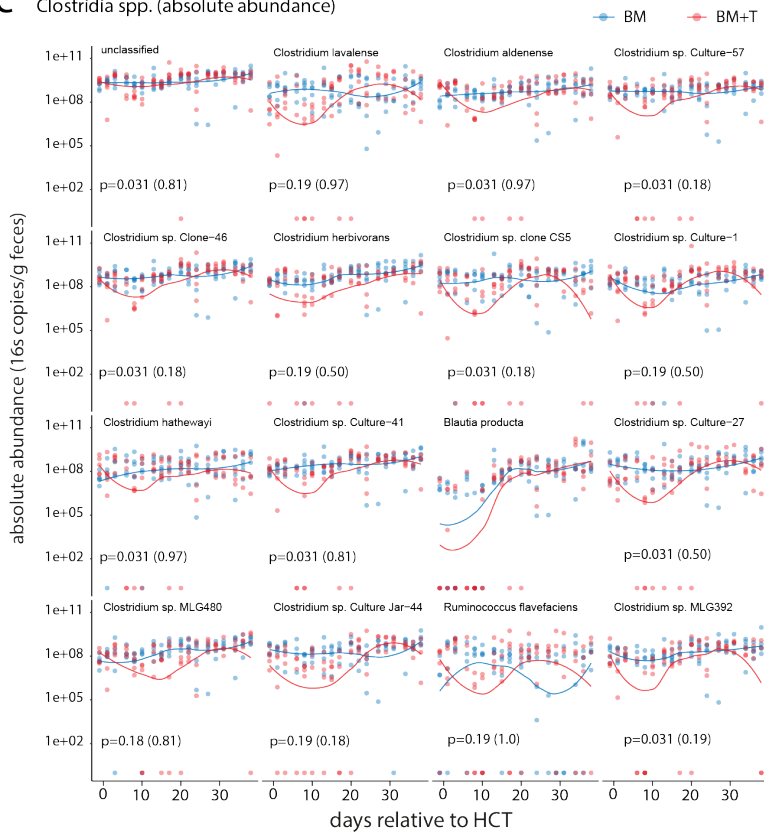

1 **Supplementary Figure 8.** (a) Relative abundances of class Clostridia, genus *Clostridium*, and genus *Enterococcus*  
2 are plotted over time relative to allo-HCT for mice that develop GVHD (BM+T) vs. transplanted, non-GVHD controls  
3 (BM; T cell depleted). These data come from the C57BL/6 into 129S1/Sv HCT shown in Figure 2A. Statistical  
4 comparison of areas under the curves was by the AUC-Vardi test. The dotted rectangle indicates samples within the  
5 time period day +3 to +13 that were used for correlation statistics in b. (b) Scatter plot of rank correlation between 146  
6 different *Clostridia spp.* and *E. faecalis* (relative abundances; within selected time period after HCT). Within the  
7 resolution of V4-V5 16S rRNA amplicon sequencing, species were annotated against the Greengenes and the NCBI  
8 16S rRNA taxonomy databases. These data show that clostridial abundances are negatively correlated with *E. faecalis*  
9 relative abundance in the BM+T group ( $p < 1e-20$ , binomial test) consistent with an expansion of *E. faecalis* at the cost  
10 of clostridia, but not in BM only mice ( $p = 0.72$ , binomial test). The 10 most negatively correlated *Clostridia spp.* are  
11 labeled in the figure. (c) The 16 most abundant *Clostridia spp.* found in the microbiota of transplanted mice are shown.  
12 We analyzed contraction of each *Clostridia spp.* in the BM+T vs. BM only groups by measuring the difference between  
13 day -1 and day +8 absolute abundances and computed paired binomial tests for each species and transplant group  
14 separately. Within each graph, we present p-values for these 16 *Clostridia spp.* (except for *B. producta* where values  
15 were missing for paired statistics). Here, we observed that contraction of clostridia occurs primarily in GVHD cases, but  
16 not in BM only mice. The contraction over all species is significant only in the BM+T group ( $p = 2.061e-42$ ), but not in  
17 BM mice. N = 5 mice / group.

18  
19  
20  
21  
22

Supplementary Figure 9

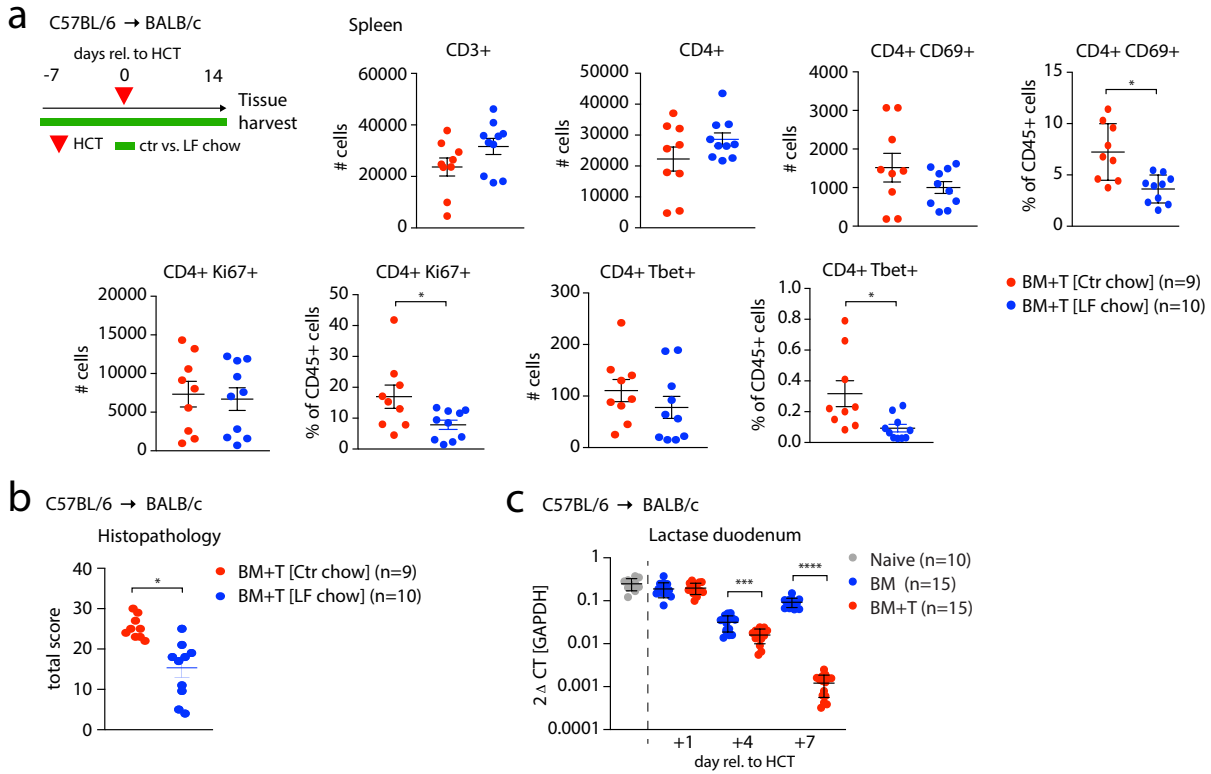

**Supplementary Figure 9.** (a) *Left*, schematic of experimental workflow of HCT in BALB/c recipients of C57BL/6 T cell-replete bone marrow (BM+T,  $5 \times 10^5$  T cells) maintained on control (Ctr) or lactose-free (LF) chow. Organs were harvested on day 14 after HCT and used for flow-cytometric analysis for T cell subsets within spleens; two experiments combined. (b) Compound histopathology GVHD score combining small and large intestine, liver and skin pathology of mice treated with control or LF chow; harvest at day 14 after allo-HCT. (c) mRNA levels of lactase in the duodenum of BALB/c mice at steady state, 1, 4 or 7 days after HCT of C57BL/6 BM or BM+T ( $1 \times 10^6$  T cells). Values represent mean  $\pm$  S.E.M. \* $p < 0.05$ ; \*\*\* $p < 0.001$ , \*\*\*\* $p < 0.0001$  (Student's T test).

1  
2  
3  
4  
5  
6  
7  
8  
9  
10  
11

Supplementary Figure 10

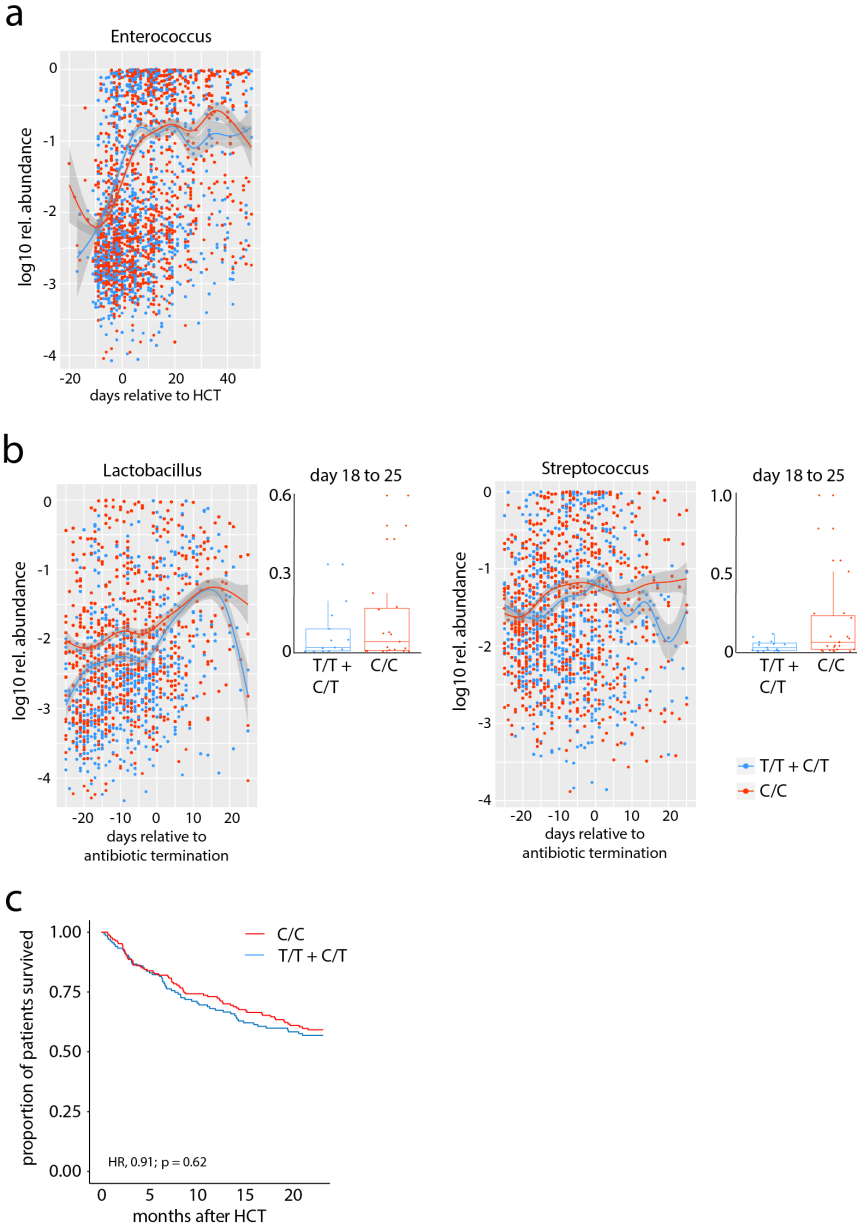

1  
2  
3 **Supplementary Figure 10.** (a) Comparable relative abundances (log<sub>10</sub>) of *Enterococcus* (genus level) at different time  
4 points before and after allo-HCT (day -20 to 50) in MSKCC patients (n=602) dichotomized in rs4988235 lactase SNP  
5 genotypes (-13910\*T SNP: C/C = 315 patients; T/T = 110 patients; C/T = 177 patients [T/T + C/T = 287 patients]). We  
6 reasoned that this might be because antibiotic exposures are likely a major driver of *Enterococcus* expansion in patients  
7 (5, 6) and that this might overcome any differences in lactose delivery to the lower intestine. We therefore hypothesized  
8 that nutritional factors like lactose utilization may affect microbiota compositions in this patient cohort only after antibiotic  
9 cessation. (b) We focused on recovery from antibiotic-induced *Enterococcus* expansion by limiting our analysis to  
10 patients who had been exposed to one of the three major broad-spectrum antibiotics used in this cohort for empiric  
11 treatment of neutropenic fevers (piperacillin-tazobactam i.v., imipenem-cilastatin i.v., or meropenem i.v.) and by  
12 synchronizing patient time courses relative to the day of antibiotic cessation. Relative abundances of *Lactobacillus* and  
13 *Streptococcus* (two other major genera within the *Lactobacillales* order); data are presented as days relative to the day  
14 of last administration of antibiotics; box plot-inserts display the median relative abundances of *Lactobacillus* (left) or  
15 *Streptococcus* (right) of time binned (in days) between day 18 to 25 after last day of antibiotic administration. (c) Overall  
16 survival of MSKCC patients dichotomized into either C/C (n = 175) or C/T+T/T genotypes (n = 140); allo-HCT recipients  
17 of bone marrow, and peripheral blood stem cells (recipients of T cell-depleted grafts were excluded in this analysis).

## 1 REFERENCES

- 2
- 3 1. Y. Litvak, M. X. Byndloss, A. J. Baumler, Colonocyte metabolism shapes the gut
- 4 microbiota. *Science* **362**, (2018).
- 5 2. M. S. Gilmore, F. Lebreton, W. van Schaik, Genomic transition of enterococci from gut
- 6 commensals to leading causes of multidrug-resistant hospital infection in the antibiotic
- 7 era. *Curr Opin Microbiol* **16**, 10-16 (2013).
- 8 3. S. Schloissnig *et al.*, Genomic variation landscape of the human gut microbiome. *Nature*
- 9 **493**, 45-50 (2013).
- 10 4. F. Lebreton *et al.*, Tracing the Enterococci from Paleozoic Origins to the Hospital. *Cell*
- 11 **169**, 849-861.e813 (2017).
- 12 5. Y. Taur *et al.*, Intestinal domination and the risk of bacteremia in patients undergoing
- 13 allogeneic hematopoietic stem cell transplantation. *Clinical infectious diseases : an*
- 14 *official publication of the Infectious Diseases Society of America* **55**, 905-914 (2012).
- 15 6. C. Ubeda *et al.*, Vancomycin-resistant Enterococcus domination of intestinal microbiota
- 16 is enabled by antibiotic treatment in mice and precedes bloodstream invasion in
- 17 humans. *J Clin Invest* **120**, 4332-4341 (2010).
- 18 7. E. Holler *et al.*, Metagenomic analysis of the stool microbiome in patients receiving
- 19 allogeneic stem cell transplantation: loss of diversity is associated with use of systemic
- 20 antibiotics and more pronounced in gastrointestinal graft-versus-host disease. *Biol Blood*
- 21 *Marrow Transplant* **20**, 640-645 (2014).
- 22 8. C. D. Ford *et al.*, Vancomycin-Resistant Enterococcus Colonization and Bacteremia and
- 23 Hematopoietic Stem Cell Transplantation Outcomes. *Biol Blood Marrow Transplant* **23**,
- 24 340-346 (2017).
- 25 9. H. J. Khoury *et al.*, Improved survival after acute graft-versus-host disease diagnosis in
- 26 the modern era. *Haematologica* **102**, 958-966 (2017).
- 27 10. Y. Shono *et al.*, Increased GVHD-related mortality with broad-spectrum antibiotic use
- 28 after allogeneic hematopoietic stem cell transplantation in human patients and mice. *Sci*
- 29 *Transl Med* **8**, 339ra371 (2016).
- 30 11. Y. Taur *et al.*, The effects of intestinal tract bacterial diversity on mortality following
- 31 allogeneic hematopoietic stem cell transplantation. *Blood* **124**, 1174-1182 (2014).
- 32 12. R. R. Jenq *et al.*, Intestinal Blautia Is Associated with Reduced Death from Graft-versus-
- 33 Host Disease. *Biol Blood Marrow Transplant* **21**, 1373-1383 (2015).
- 34 13. Y. Taur *et al.*, Reconstitution of the gut microbiota of antibiotic-treated patients by
- 35 autologous fecal microbiota transplant. *Sci Transl Med* **10**, (2018).
- 36 14. N. Steck *et al.*, Enterococcus faecalis metalloprotease compromises epithelial barrier
- 37 and contributes to intestinal inflammation. *Gastroenterology* **141**, 959-971 (2011).
- 38 15. N. Geva-Zatorsky *et al.*, Mining the Human Gut Microbiota for Immunomodulatory
- 39 Organisms. *Cell* **168**, 928-943.e911 (2017).
- 40 16. K. Riesner, M. Kalupa, Y. Shi, S. Elezkurtaj, O. Penack, A preclinical acute GVHD
- 41 mouse model based on chemotherapy conditioning and MHC-matched transplantation.
- 42 *Bone Marrow Transplant* **51**, 410-417 (2016).
- 43 17. K. Dubin, E. G. Pamer, Enterococci and Their Interactions with the Intestinal
- 44 Microbiome. *Microbiology spectrum* **5**, (2014).
- 45 18. R. R. Jenq *et al.*, Regulation of intestinal inflammation by microbiota following allogeneic
- 46 bone marrow transplantation. *J Exp Med* **209**, 903-911 (2012).
- 47 19. S. Caballero *et al.*, Cooperating Commensals Restore Colonization Resistance to
- 48 Vancomycin-Resistant Enterococcus faecium. *Cell Host Microbe* **21**, 592-602.e594
- 49 (2017).



- 1 20. N. W. Palm *et al.*, Immunoglobulin A coating identifies colitogenic bacteria in  
2 inflammatory bowel disease. *Cell* **158**, 1000-1010 (2014).
- 3 21. K. Brandl *et al.*, Vancomycin-resistant enterococci exploit antibiotic-induced innate  
4 immune deficits. *Nature* **455**, 804-807 (2008).
- 5 22. D. Zhao *et al.*, Survival signal REG3 $\alpha$  prevents crypt apoptosis to control acute  
6 gastrointestinal graft-versus-host disease. *J Clin Invest* **128**, 4970-4979 (2018).
- 7 23. C. A. Lindemans *et al.*, Interleukin-22 promotes intestinal-stem-cell-mediated epithelial  
8 regeneration. *Nature* **528**, 560-564 (2015).
- 9 24. K. H. Schleifer, A. Hartinger, F. Götz, Occurrence of D-tagatose-6-phosphate pathway of  
10 D-galactose metabolism among staphylococci. *FEMS Microbiology Letters* **3**, 9-11  
11 (1978).
- 12 25. D. Weber *et al.*, Microbiota Disruption Induced by Early Use of Broad-Spectrum  
13 Antibiotics Is an Independent Risk Factor of Outcome after Allogeneic Stem Cell  
14 Transplantation. *Biol Blood Marrow Transplant* **23**, 845-852 (2017).
- 15 28. P. A. Gill, M. C. van Zelm, J. G. Muir, P. R. Gibson, Review article: short chain fatty  
16 acids as potential therapeutic agents in human gastrointestinal and inflammatory  
17 disorders. *Aliment Pharmacol Ther* **48**, 15-34 (2018).
- 18 27. N. D. Mathewson *et al.*, Gut microbiome-derived metabolites modulate intestinal  
19 epithelial cell damage and mitigate graft-versus-host disease. *Nat Immunol* **17**, 505-513  
20 (2016).
- 21 28. B. W. Haak *et al.*, Impact of gut colonization with butyrate-producing microbiota on  
22 respiratory viral infection following allo-HCT. *Blood* **131**, 2978-2986 (2018).
- 23 29. C. J. Ingram, C. A. Mulcare, Y. Itan, M. G. Thomas, D. M. Swallow, Lactose digestion  
24 and the evolutionary genetics of lactase persistence. *Hum Genet* **124**, 579-591 (2009).
- 25 30. J. Vydra *et al.*, Enterococcal bacteremia is associated with increased risk of mortality in  
26 recipients of allogeneic hematopoietic stem cell transplantation. *Clin Infect Dis* **55**, 764-  
27 770 (2012).
- 28 31. S. Manfredo Vieira *et al.*, Translocation of a gut pathobiont drives autoimmunity in mice  
29 and humans. *Science* **359**, 1156-1161 (2018).
- 30 32. S. G. Kim *et al.*, Microbiota-derived lantibiotic restores resistance against vancomycin-  
31 resistant *Enterococcus*. *Nature* **572**, 665-669 (2019).
- 32 33. M. Levy, A. A. Kolodziejczyk, C. A. Thaiss, E. Elinav, Dysbiosis and the immune system.  
33 *Nat Rev Immunol* **17**, 219-232 (2017).
- 34 34. J. R. Galloway-Pena *et al.*, The role of the gastrointestinal microbiome in infectious  
35 complications during induction chemotherapy for acute myeloid leukemia. *Cancer* **122**,  
36 2186-2196 (2016).
- 37 35. A. Staffas *et al.*, Nutritional Support from the Intestinal Microbiota Improves  
38 Hematopoietic Reconstitution after Bone Marrow Transplantation in Mice. *Cell Host*  
39 *Microbe* **23**, 447-457 e444 (2018).
- 40 36. T. Rognes, T. Flouri, B. Nichols, C. Quince, F. Mahé, VSEARCH: a versatile open  
41 source tool for metagenomics. *PeerJ* **4**, e2584 (2016).
- 42 37. T. Tatusova *et al.*, in *The NCBI Handbook [Internet]*. (National Center for Biotechnology  
43 Information (US), 2014).
- 44 38. T. Z. DeSantis *et al.*, Greengenes, a chimera-checked 16S rRNA gene database and  
45 workbench compatible with ARB. *Appl Environ Microbiol* **72**, 5069-5072 (2006).
- 46 39. J. G. Caporaso *et al.*, QIIME allows analysis of high-throughput community sequencing  
47 data. *Nat Methods* **7**, 335-336 (2010).
- 48 40. P. D. Schloss *et al.*, Introducing mothur: open-source, platform-independent, community-  
49 supported software for describing and comparing microbial communities. *Appl Environ*  
50 *Microbiol* **75**, 7537-7541 (2009).

- 1 41. J. Lloyd-Price *et al.*, Strains, functions and dynamics in the expanded Human  
2 Microbiome Project. *Nature* **550**, 61-66 (2017).
- 3 42. T. Brettin *et al.*, RASTtk: a modular and extensible implementation of the RAST  
4 algorithm for building custom annotation pipelines and annotating batches of genomes.  
5 *Sci Rep* **5**, 8365 (2015).
- 6 43. M. Viladomiu *et al.*, IgA-coated E. coli enriched in Crohn's disease spondylarthritis  
7 promote Th17-dependent inflammation. *Sci Transl Med* **9**, eaaf9655 (2017).
- 8 44. A. L. Kau *et al.*, Functional characterization of IgA-targeted bacterial taxa from  
9 undernourished Malawian children that produce diet-dependent enteropathy. *Sci Transl*  
10 *Med* **7**, 276ra224 (2015).
- 11 45. Y. Gavrieli, Y. Sherman, S. A. Ben-Sasson, Identification of programmed cell death in  
12 situ via specific labeling of nuclear DNA fragmentation. *J Cell Biol* **119**, 493-501 (1992).
- 13 46. S. Naserian *et al.*, Simple, Reproducible, and Efficient Clinical Grading System for  
14 Murine Models of Acute Graft-versus-Host Disease. *Front Immunol* **9**, 10 (2018).
- 15 47. N. Segata *et al.*, Metagenomic biomarker discovery and explanation. *Genome Biol* **12**,  
16 R60 (2011).
- 17 48. Y. Vardi, Z. Ying, C.-H. Zhang, Two-Sample Tests for Growth Curves under Dependent  
18 Right Censoring. *Biometrika* **88**, 949-960 (2001).
- 19 49. B. J. Webb *et al.*, Prediction of Bloodstream Infection Due to Vancomycin-Resistant  
20 Enterococcus in Patients Undergoing Leukemia Induction or Hematopoietic Stem-Cell  
21 Transplantation. *Clin Infect Dis* **64**, 1753-1759 (2017).
- 22 50. A. C. Burman *et al.*, IFNgamma differentially controls the development of idiopathic  
23 pneumonia syndrome and GVHD of the gastrointestinal tract. *Blood* **110**, 1064-1072  
24 (2007).
- 25 51. F. P. Nestel, K. S. Price, T. A. Seemayer, W. S. Lapp, Macrophage priming and  
26 lipopolysaccharide-triggered release of tumor necrosis factor alpha during graft-versus-  
27 host disease. *J Exp Med* **175**, 405-413 (1992).
- 28 52. P. Garside, S. Reid, M. Steel, A. M. Mowat, Differential cytokine production associated  
29 with distinct phases of murine graft-versus-host reaction. *Immunology* **82**, 211-214  
30 (1994).
- 31 53. A. M. Mowat, Antibodies to IFN-gamma prevent immunologically mediated intestinal  
32 damage in murine graft-versus-host reaction. *Immunology* **68**, 18-23 (1989).

34
